# Supplementary material for: The sham effect of invasive interventions in chronic coronary syndromes: a systematic review and meta-analysis
Source: Springer Nature journal article supplement (doi:10.1186/s12872-022-02658-x), 2022-05-14
Supplement: MOESM1 [file 20402460]

# ADDITIONAL FILE 1

## SEARCH, STUDY SELECTION AND RISK OF BIAS

*The sham effect of invasive interventions in chronic coronary syndromes – a systematic review and meta-analysis*

Authors: Catarina Palma, Cláudio David MD, Ricardo M Fernandes MD PhD, Fausto J Pinto MD PhD, João Costa MD PhD, Joaquim J Ferreira MD PhD, Daniel Caldeira MD PhD



Table of contents

|                                                                        |   |
|------------------------------------------------------------------------|---|
| Search Strategy.....                                                   | 4 |
| Supplementary Tables.....                                              | 5 |
| Supplementary Table 1: Reasons for exclusion in full-text review ..... | 5 |
| Supplementary Figures.....                                             | 8 |
| Supplementary Figure 1: Risk of Bias of included studies.....          | 8 |

## Search Strategy

| #  | Searches                     |
|----|------------------------------|
| 1  | exp Angina Pectoris/         |
| 2  | exp Angina, Stable/          |
| 3  | angina.ti,ab.                |
| 4  | coronary.ti,ab.              |
| 5  | exp Myocardial Ischemia/     |
| 6  | exp Coronary Artery Disease/ |
| 7  | 1 or 2 or 3 or 4 or 5 or 6   |
| 8  | random*.af.                  |
| 9  | sham.ti,ab.                  |
| 10 | sham*.ti,ab.                 |
| 11 | blind*.ti,ab.                |
| 12 | 8 or 11                      |
| 13 | 9 or 10                      |
| 14 | 7 and 12 and 13              |
| 15 | exp animals/ not humans.sh.  |
| 16 | 14 not 15                    |
| 17 | remove duplicates from 16    |

## Supplementary Tables

Supplementary Table 1: Reasons for exclusion in full-text review

|                 |                                                                                                                            |
|-----------------|----------------------------------------------------------------------------------------------------------------------------|
| Amin 2010       | Non-invasive intervention – the study uses Enhanced External Counterpulsation, which is considered a non-invasive therapy. |
| Arora 1999      | Non-invasive intervention – the study uses Enhanced External Counterpulsation, which is considered a non-invasive therapy. |
| Arora 2002      | Non-invasive intervention – the study uses Enhanced External Counterpulsation, which is considered a non-invasive therapy. |
| Avery 2014      | Non-invasive intervention – the study uses Enhanced External Counterpulsation, which is considered a non-invasive therapy. |
| Ballegaard 1986 | Non-invasive intervention – the study uses acupuncture, which is considered a non-invasive therapy.                        |
| Ballegaard 1990 | Non-invasive intervention – the study uses acupuncture, which is considered a non-invasive therapy.                        |
| Ballegaard 1991 | Non-invasive intervention – the study uses acupuncture, which is considered a non-invasive therapy.                        |
| Banai 2013      | Not a RCT – this study is an open-label trial, not a randomized controlled trial.                                          |
| Bartunek 2017   | No data – this study does not provide outcomes of interest.                                                                |
| Beck 2015       | Non-invasive intervention – the study uses Enhanced External Counterpulsation, which is considered a non-invasive therapy. |
| Beres 2006      | No sham procedure – this study does not include a sham procedure.                                                          |
| Brockow 2000    | Not a RCT – this study is a review.                                                                                        |
| Casey 2011      | Non-invasive intervention – the study uses Enhanced External Counterpulsation, which is considered a non-invasive therapy. |
| Corcoran 2018   | Not a RCT – this study is the definition of a study design, without results.                                               |
| Dimond 1960     | No data – the study does not provide enough information about the sham group and its results.                              |
| Eddicks 2007    | No data – the study does not provide information about the group that starts with the sham intervention.                   |
| Fisher 2013     | Not a RCT – this study is a review.                                                                                        |
| Glazachev 2018  | Non-invasive intervention – the study uses Intermittent hypoxia-hyperoxia, which is considered a non-invasive therapy.     |

*The sham effect of invasive interventions in chronic coronary syndromes*

|                      |                                                                                                                                                                                                                                         |
|----------------------|-----------------------------------------------------------------------------------------------------------------------------------------------------------------------------------------------------------------------------------------|
| Hausenloy 2016       | Non-invasive intervention – the study uses Remote ischemic preconditioning, which is considered a non-invasive therapy.                                                                                                                 |
| Hautvast 1998        | Unblinded – this study is not patient blinded.                                                                                                                                                                                          |
| Hoffmann 2015        | Not a RCT – this study is the definition of a study design, without results.                                                                                                                                                            |
| Jeong 2013           | Not a RCT – this study is a review.                                                                                                                                                                                                     |
| Jimenez-Quevedo 2014 | No sham procedure – this study does not include a sham procedure.                                                                                                                                                                       |
| Jolicoeur 2013       | Not a RCT – this study is the definition of a study design, without results.                                                                                                                                                            |
| Kandala 2013         | Not a RCT – this study is a review.                                                                                                                                                                                                     |
| Khan 2014            | Not a RCT – this study is a case report.                                                                                                                                                                                                |
| Khan 2015            | Not a RCT – this study is the definition of a study design, without results.                                                                                                                                                            |
| Khan 2015            | Not a RCT – this study is the definition of a study design, without results.                                                                                                                                                            |
| Khan 2017            | No data – this study is a crossover randomized controlled trial, with a sham arm. The results are presented for the overall period of the sham intervention, in both groups, not individualized results before and after the crossover. |
| Kikuchi 2010         | Non-invasive intervention – the study uses cardiac shock wave therapy, which is considered non-invasive.                                                                                                                                |
| Konigstein 2014      | No sham procedure – this study does not include a sham procedure.                                                                                                                                                                       |
| Kuehn 2018           | Not a RCT – the study is a narrative review.                                                                                                                                                                                            |
| Lanza 2011           | No sham procedure – this study uses a low stimulation group, not considered a true sham procedure.                                                                                                                                      |
| Lanza 2012           | Not a RCT – the study is an abstract.                                                                                                                                                                                                   |
| Leibowitz 2012       | Non-invasive intervention – the study uses cardiac shock wave therapy, which is considered non-invasive.                                                                                                                                |
| Miller 2012          | Not a RCT – this study is a review.                                                                                                                                                                                                     |
| Nnoaham 2008         | Not a RCT – this study is a review.                                                                                                                                                                                                     |

*The sham effect of invasive interventions in chronic coronary syndromes*

|                    |                                                                                                          |
|--------------------|----------------------------------------------------------------------------------------------------------|
| Perin 2012         | No data - the study does not provide information about some additional explored outcomes.                |
| Pokushalov 2009    | No sham procedure – this study does not include a sham procedure.                                        |
| Salem 2006         | No sham procedure – this study does not include a sham procedure.                                        |
| Saririan 2003      | Not a RCT – this study is a review.                                                                      |
| Shkolnik 2018      | Non-invasive intervention – the study uses cardiac shock wave therapy, which is considered non-invasive. |
| Shkolnik 2018      | Not a RCT – this study is the definition of a study design, without results.                             |
| Soran 1999         | Not a RCT – this study is a review.                                                                      |
| Szatkowski 2002    | Not a RCT – this study is a review.                                                                      |
| Thadani 2014       | Not a RCT – this study is a review.                                                                      |
| Tsivgoulis 2017    | Not a RCT – this study is a review.                                                                      |
| Van Ramshorst 2011 | No data - the study does not provide information about our selected outcomes.                            |
| Zipes 2012         | No sham procedure – this study uses a low stimulation group, not considered a true sham procedure.       |

Supplementary Figures

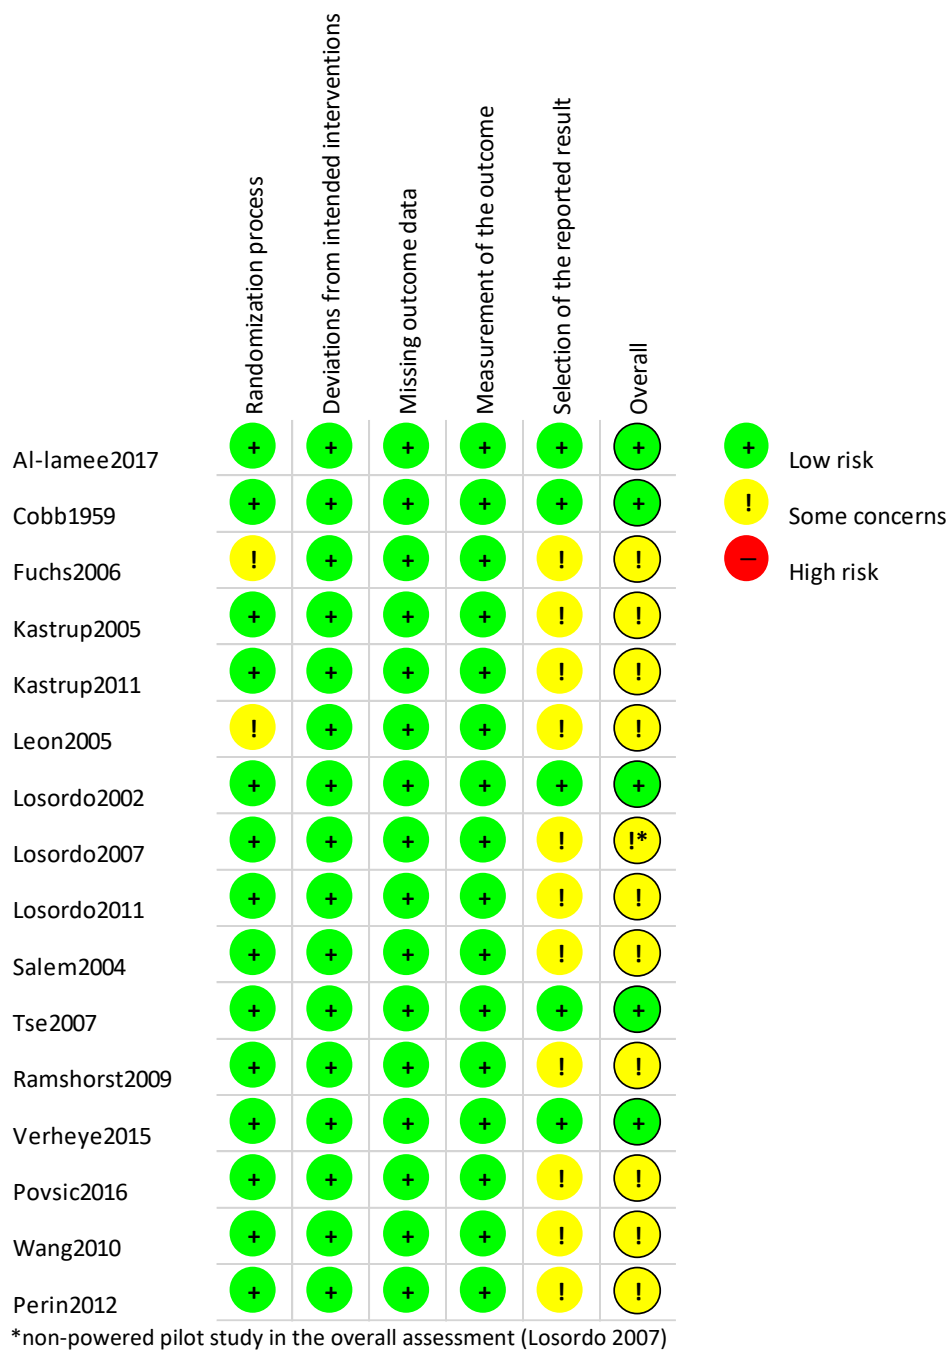

Supplementary Figure 1: Risk of Bias of included studies
