# Supplementary material for: The sham effect of invasive interventions in chronic coronary syndromes: a systematic review and meta-analysis
Source: Springer Nature journal article supplement (doi:10.1186/s12872-022-02658-x), 2022-05-14
Supplement: MOESM2 [file 20402460]

# ADDITIONAL FILE 2

**Analyses of exercise time (measured as mean difference, and subgroup analyses)  
CCS class change and anginal episodes**

*The sham effect of invasive interventions in chronic coronary syndromes –  
a systematic review and meta-analysis*

Authors: Catarina Palma, Cláudio David MD, Ricardo M Fernandes MD PhD, Fausto J  
Pinto MD PhD, João Costa MD PhD, Joaquim J Ferreira MD PhD, Daniel Caldeira MD PhD

## Table of contents

|                                                                                                                                                                      |   |
|----------------------------------------------------------------------------------------------------------------------------------------------------------------------|---|
| Supplementary Figure: Mean difference of exercise time.....                                                                                                          | 3 |
| Supplementary Figure: Analysis of relative change for exercise time according with the type of sham.....                                                             | 3 |
| Supplementary Figure: Analysis of relative change for exercise time according with the mean LVEF/proportion of HF patients. HF: Heart failure; NR: not reported..... | 4 |
| Supplementary Figure: Mean difference of Canadian Cardiovascular Society angina class. ....                                                                          | 4 |
| Supplementary Figure: Mean difference of anginal episodes and nitroglycerine use per week. ....                                                                      | 5 |

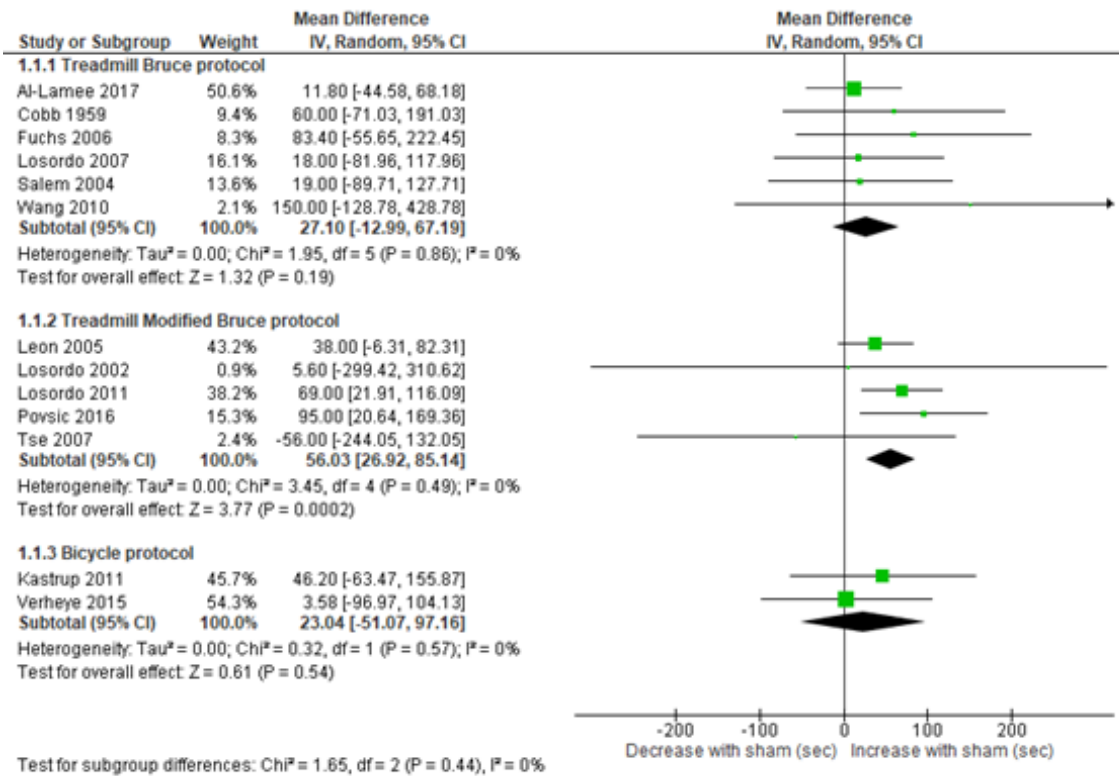

Supplementary Figure: Mean difference of exercise time

Pooled and individual mean difference and 95% CI for the exercise time outcome with Bruce protocol, modified Bruce protocol and bicycle protocol.

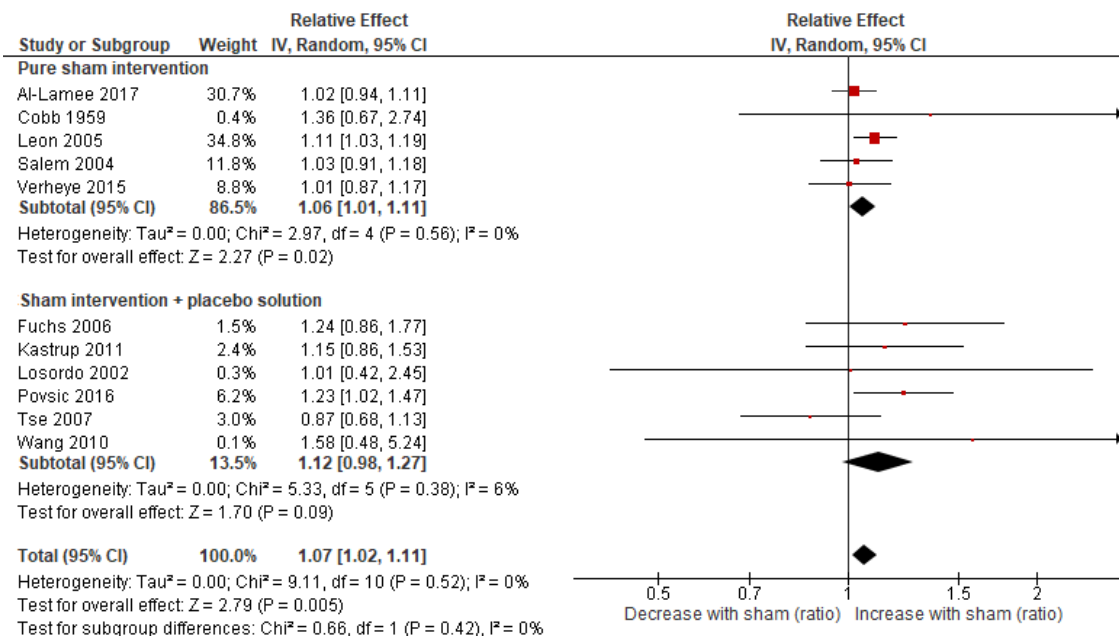

Supplementary Figure: Analysis of relative change for exercise time according with the type of sham

Pooled and individual relative effect and 95% CI for exercise time according with the type of sham (pure sham intervention or sham intervention + placebo solution).

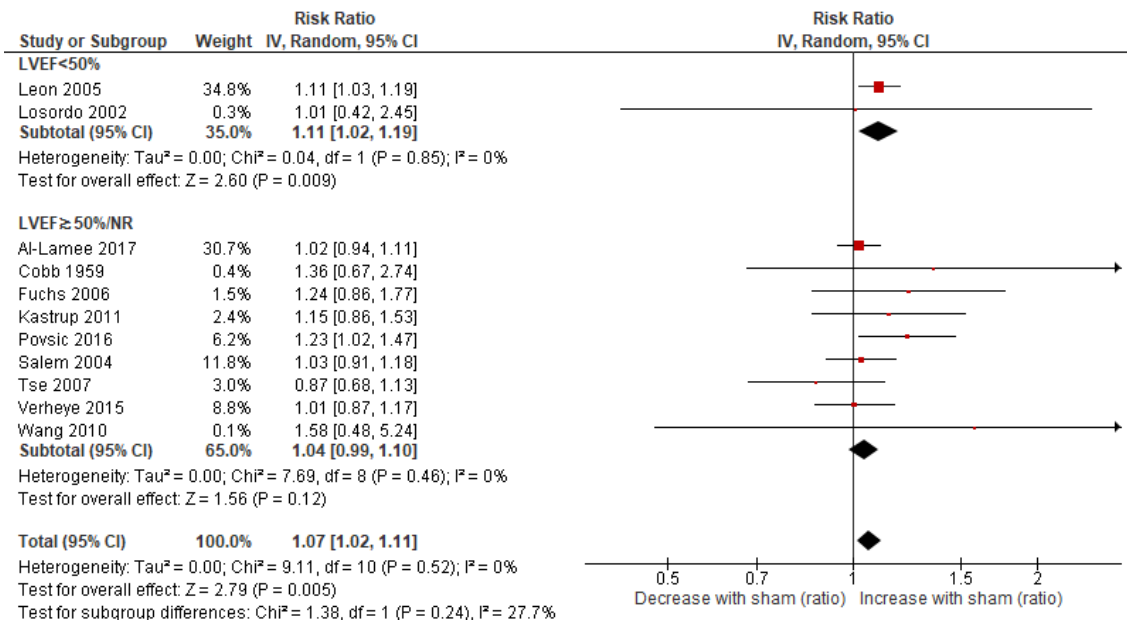

Supplementary Figure: Analysis of relative change for exercise time according with the mean LVEF/proportion of HF patients. HF: Heart failure; NR: not reported

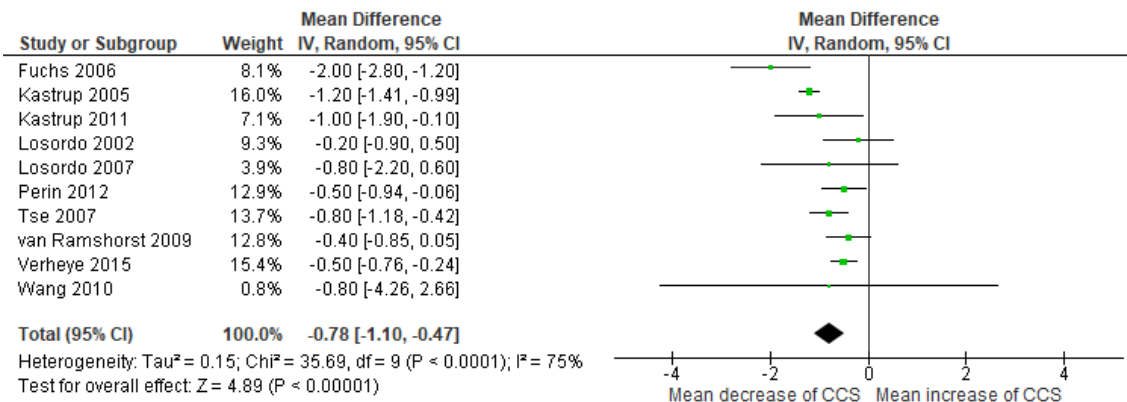

Supplementary Figure: Mean difference of Canadian Cardiovascular Society angina class.

Pooled and individual mean difference and 95% CI for the CCS angina class outcome.

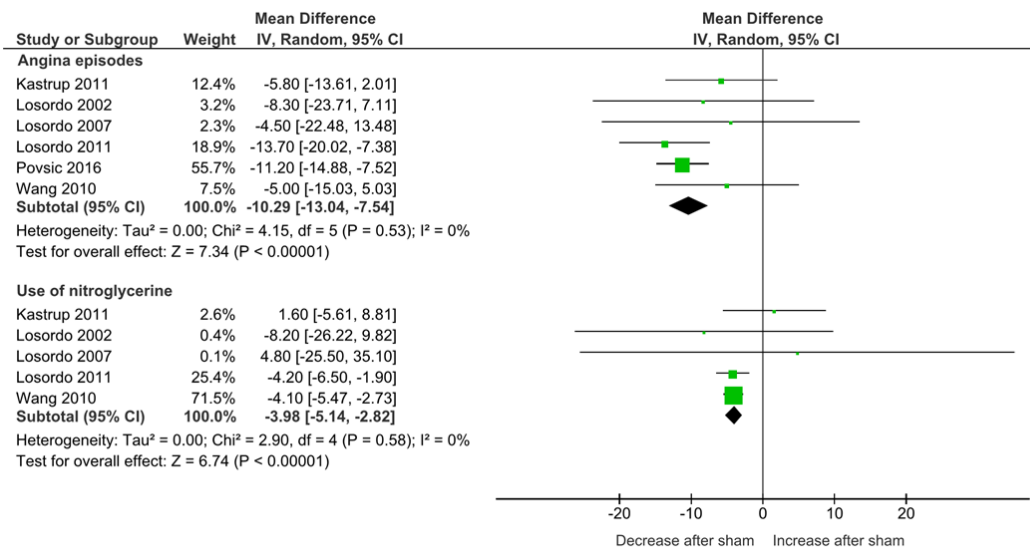

Supplementary Figure: Mean difference of anginal episodes and nitroglycerine use per week.

Pooled and individual mean difference and 95% CI for the anginal episodes and nitroglycerine use per week outcome.
