# Supplementary material for: The sham effect of invasive interventions in chronic coronary syndromes: a systematic review and meta-analysis
Source: Springer Nature journal article supplement (doi:10.1186/s12872-022-02658-x), 2022-05-14
Supplement: MOESM3 [file 20402460]

# ADDITIONAL FILE 3

## PUBLICATION BIAS

*The sham effect of invasive interventions in chronic coronary syndromes – a systematic review and meta-analysis*

Authors: Catarina Palma, Cláudio David MD, Ricardo M Fernandes MD PhD, Fausto J Pinto MD PhD, João Costa MD PhD, Joaquim J Ferreira MD PhD, Daniel Caldeira MD PhD

Table of contents

|                                                                                                                                                                                                                            |    |
|----------------------------------------------------------------------------------------------------------------------------------------------------------------------------------------------------------------------------|----|
| Supplementary Table: Publication/small studies Effect bias evaluation .....                                                                                                                                                | 4  |
| Supplementary Figure: Funnel plot for the analysis of exercise time relative change (upper panel); Trim-fill analyses with the addition of 2 estimates and the resulting forest plot (lower panel).....                    | 5  |
| Supplementary Figure: Funnel plot for the analysis of exercise time SMD (upper panel); Trim-fill analyses with the addition of 1 estimate and the resulting forest plot (lower panel).....                                 | 6  |
| Supplementary Figure: Funnel plot for the analysis of absolute mean difference of exercise time (upper panel); Trim-fill analyses with the addition of 1 estimate and the resulting forest plot (lower panel). .....       | 7  |
| Supplementary Figure: Funnel plot for the analysis of angina episodes relative change (upper panel); Trim-fill analyses with the addition of 3 estimates and the resulting forest plot (lower panel).....                  | 8  |
| Supplementary Figure 10: Funnel plot for the analysis of absolute mean difference of angina episodes (upper panel); Trim-fill analyses with the addition of 2 estimates and the resulting forest plot (lower panel). ..... | 9  |
| Supplementary Figure 11: Funnel plot for the analysis of CCS class; The trim-fill analysis did not add any further study. ....                                                                                             | 10 |
| Supplementary Figure: Funnel plot for the analysis of relative change in NTG use (upper panel); Trim-fill analyses with the addition of 1 estimate and the resulting forest plot (lower panel).....                        | 11 |
| Supplementary Figure: Funnel plot for the analysis of mean difference of NTG use (upper panel); Trim-fill analyses with the addition of 1 estimate and the resulting forest plot (lower panel).....                        | 12 |
| Supplementary Figure: Funnel plot for the analysis of SAQ physical functioning (upper panel); Trim-fill analyses with the addition of 1 estimate and the resulting forest plot (lower panel).....                          | 13 |
| Supplementary Figure: Funnel plot for the analysis of SAQ anginal stability (upper panel); Trim-fill analyses with the addition of 1 estimate and the resulting forest plot (lower panel).....                             | 14 |
| Supplementary Figure: Funnel plot for the analysis of SAQ anginal frequency (upper panel); Trim-fill analyses with the addition of 1 estimate and the resulting forest plot (lower panel).....                             | 15 |
| Supplementary Figure: Funnel plot for the analysis of SAQ treatment satisfaction (upper panel); Trim-fill analyses with the addition of 1 estimate and the resulting forest plot (lower panel).....                        | 16 |
| Supplementary Figure: Funnel plot for the analysis of SAQ disease perception (upper panel); The trim-fill analysis did not add any further study.....                                                                      | 17 |



Supplementary Table: Publication/small studies Effect bias evaluation

| Publication/small studies Effect bias evaluation |                                     |               |
|--------------------------------------------------|-------------------------------------|---------------|
| Outcome                                          | Outcome subtype                     | p-value Egger |
| Exercise Time                                    | Relative change                     | 0.361         |
|                                                  | SMD                                 | 0.667         |
|                                                  | Mean difference                     | 0.802         |
| Angina episodes                                  | Relative change in angina episodes  | 0.126         |
|                                                  | Mean difference for angina episodes | 0.209         |
| CCS class                                        | CCS                                 | 0.729         |
| NTG use                                          | Relative change in NTG use          | 0.871         |
|                                                  | Mean change in NTG use              | 0.411         |
| SAQ                                              | Physical functioning                | 0.859         |
|                                                  | Angina stability                    | 0.709         |
|                                                  | Angina frequency                    | 0.785         |
|                                                  | Treatment satisfaction              | 0.874         |
|                                                  | Disease perception                  | 0.956         |

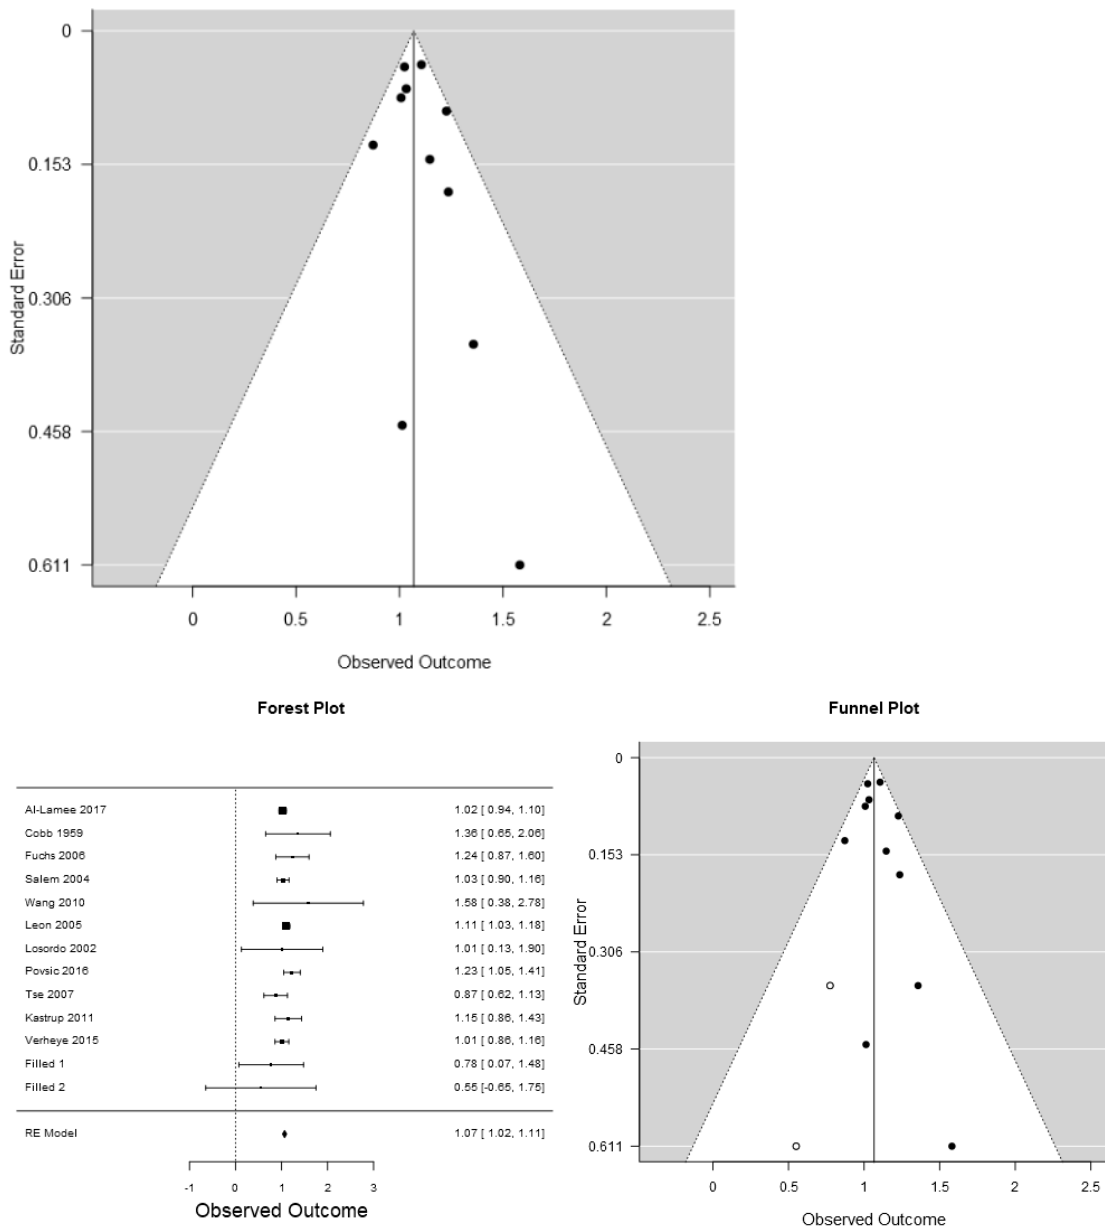

Supplementary Figure: Funnel plot for the analysis of exercise time relative change (upper panel); Trim-fill analyses with the addition of 2 estimates and the resulting forest plot (lower panel).

The sham effect of invasive interventions in chronic coronary syndromes

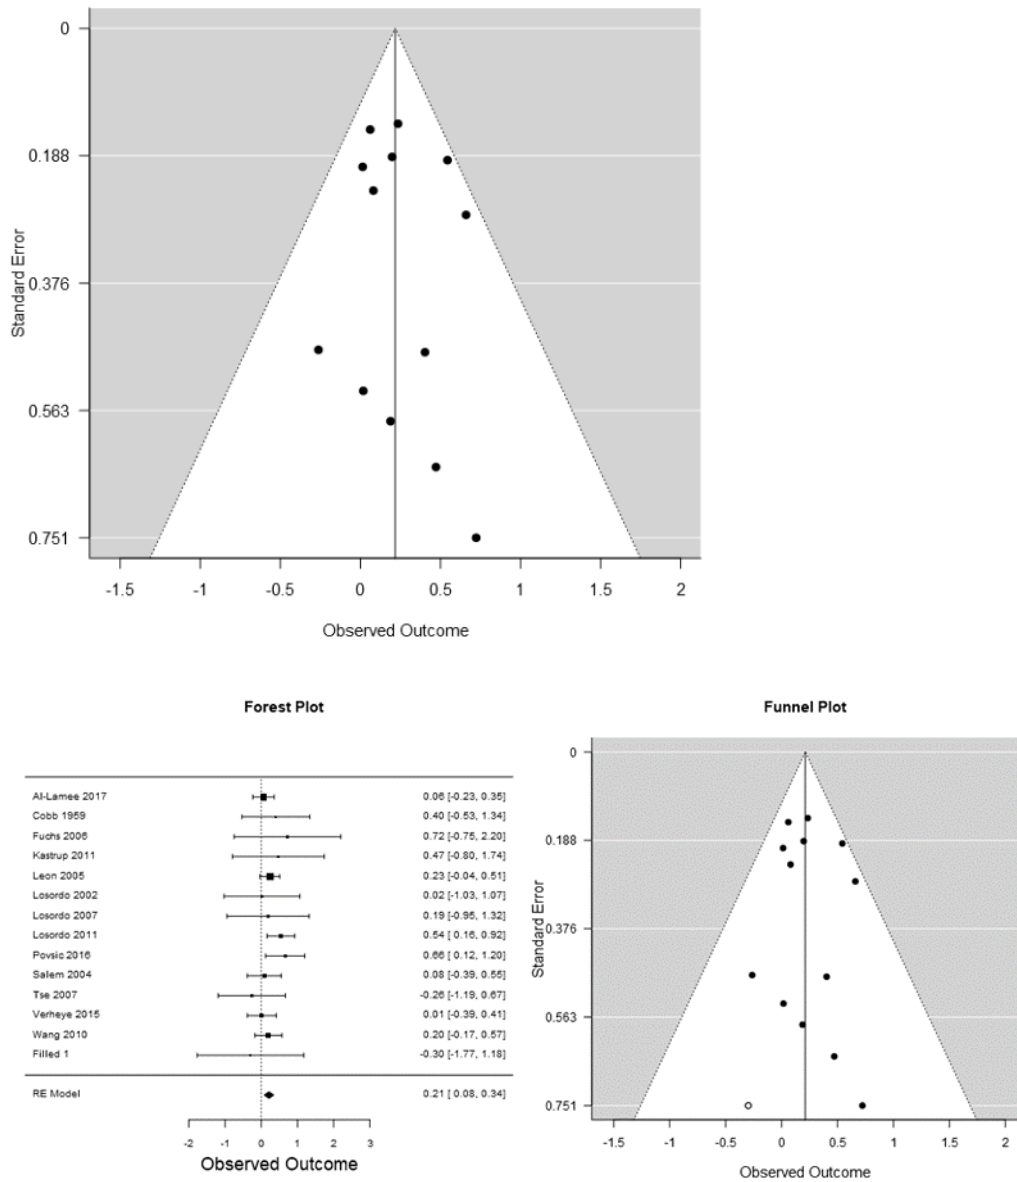

Supplementary Figure: Funnel plot for the analysis of exercise time SMD (upper panel); Trim-fill analyses with the addition of 1 estimate and the resulting forest plot (lower panel).

The sham effect of invasive interventions in chronic coronary syndromes

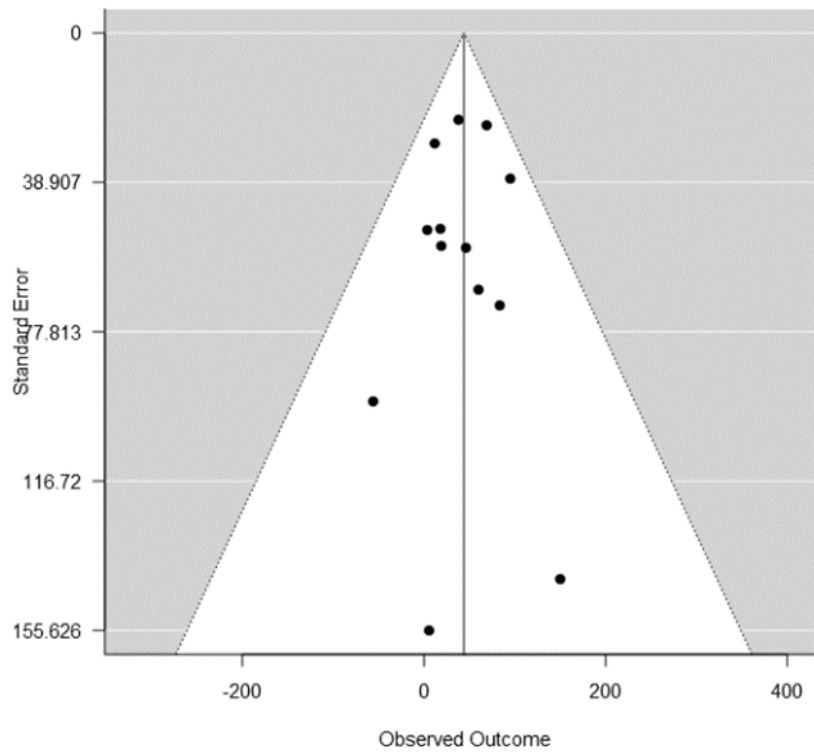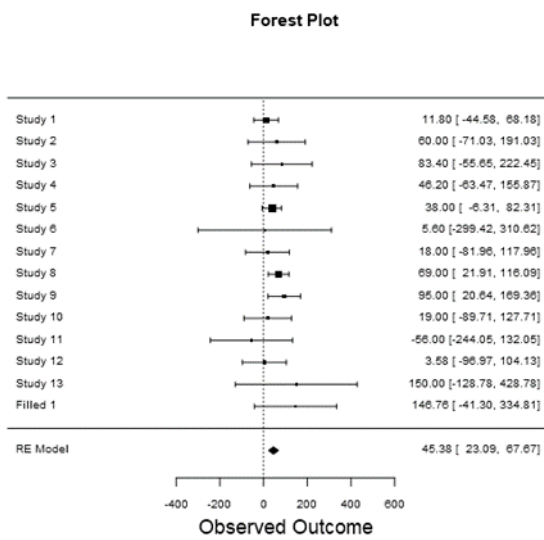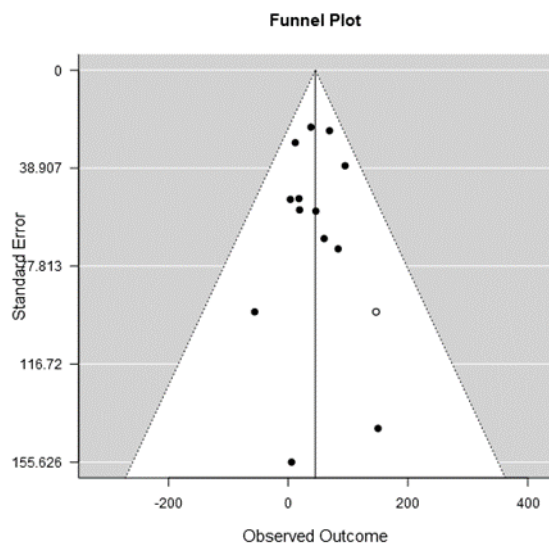

Supplementary Figure: Funnel plot for the analysis of absolute mean difference of exercise time (upper panel); Trim-fill analyses with the addition of 1 estimate and the resulting forest plot (lower panel).

The sham effect of invasive interventions in chronic coronary syndromes

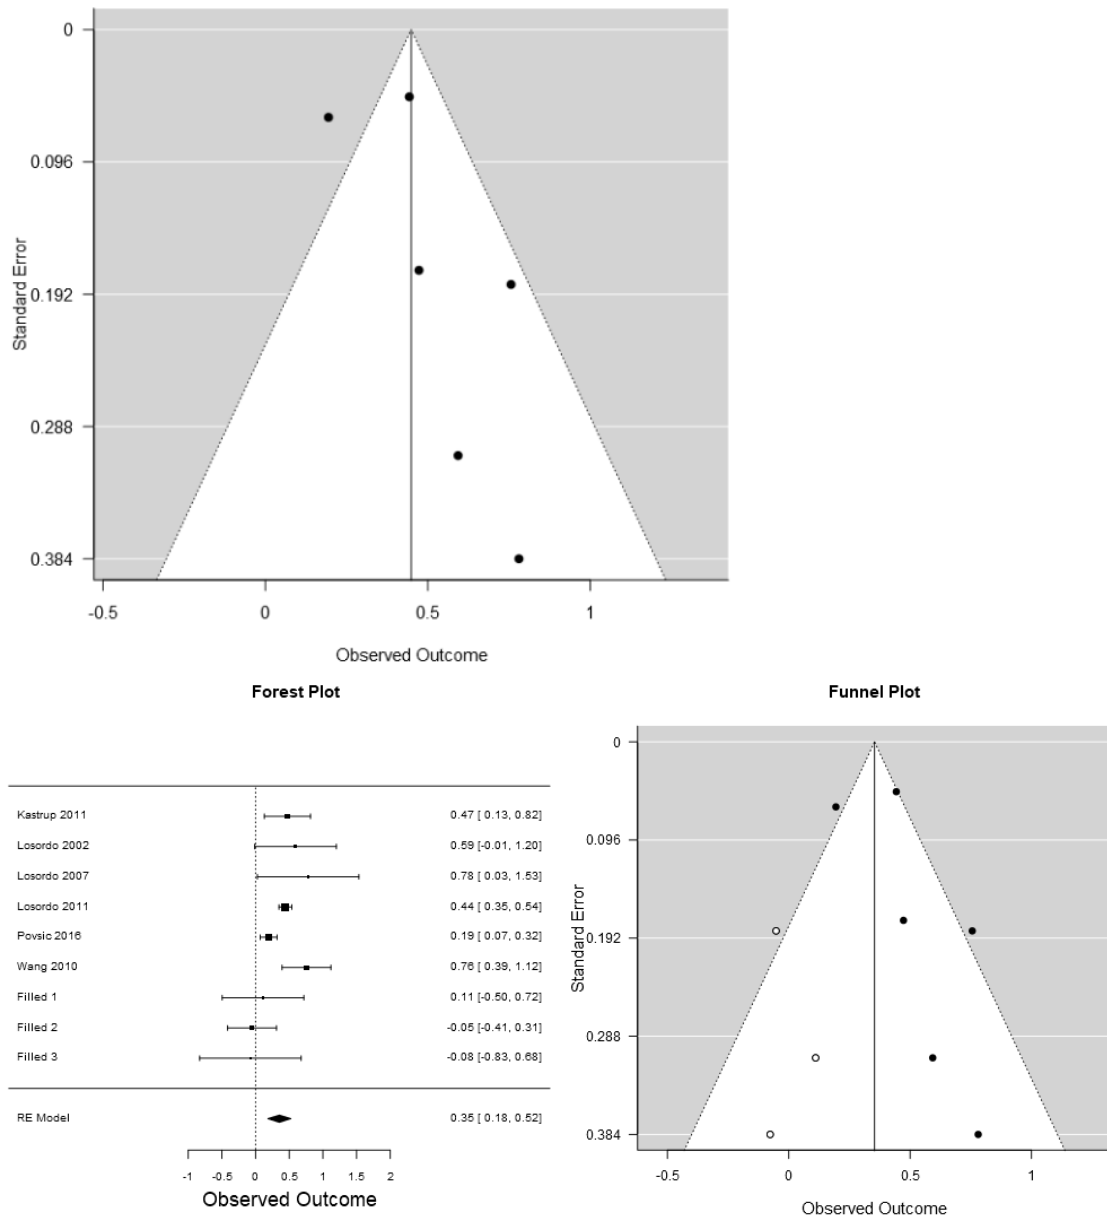

Supplementary Figure: Funnel plot for the analysis of angina episodes relative change (upper panel); Trim-fill analyses with the addition of 3 estimates and the resulting forest plot (lower panel).



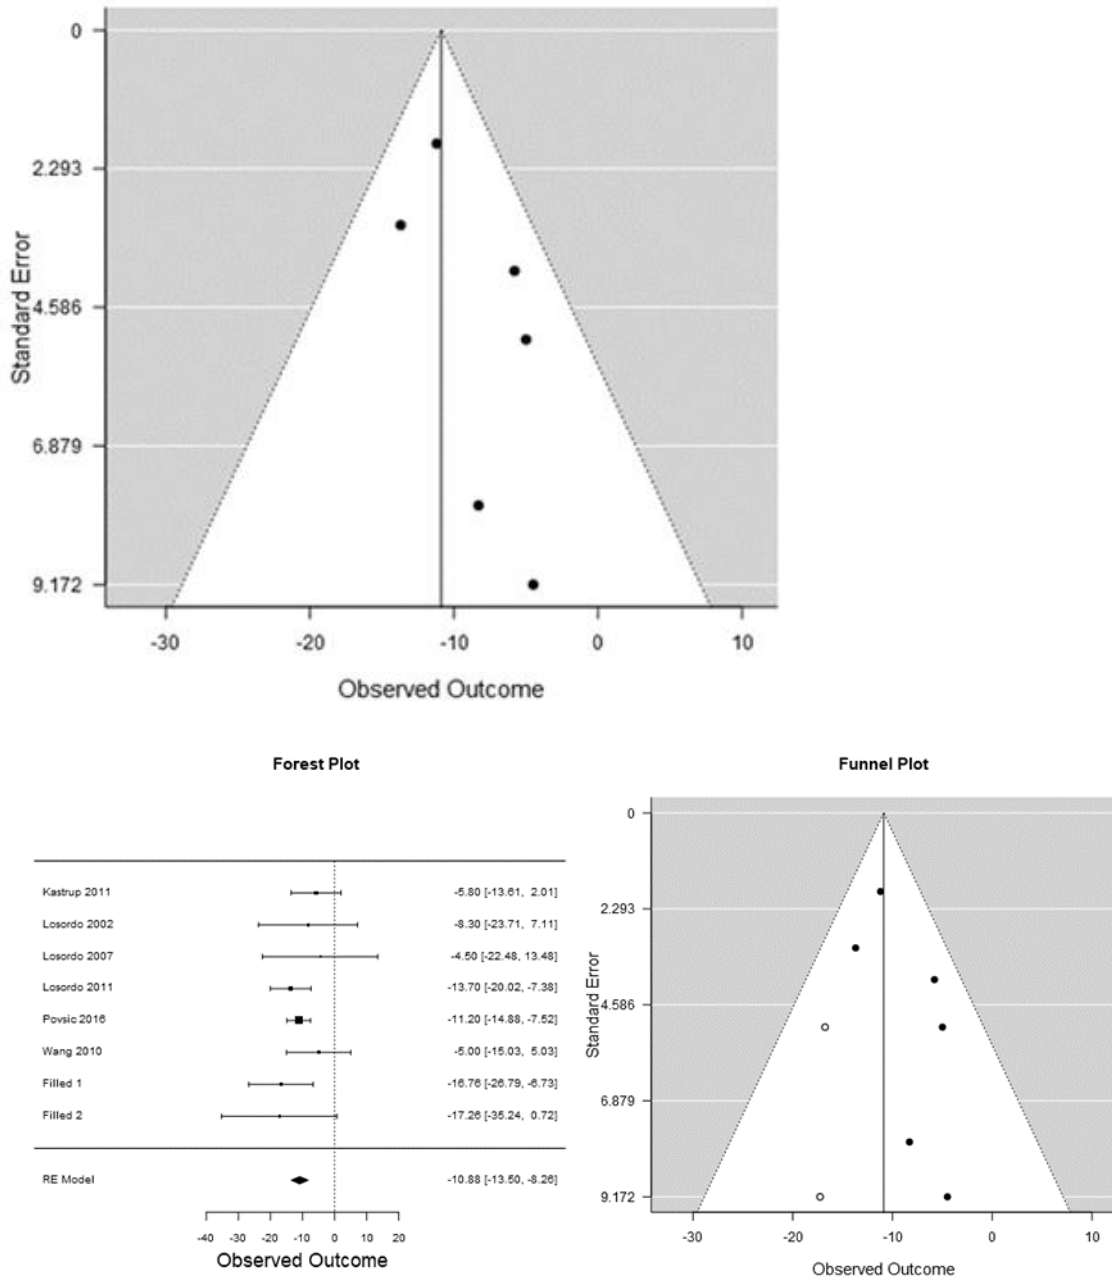

Supplementary Figure 10: Funnel plot for the analysis of absolute mean difference of angina episodes (upper panel); Trim-fill analyses with the addition of 2 estimates and the resulting forest plot (lower panel).

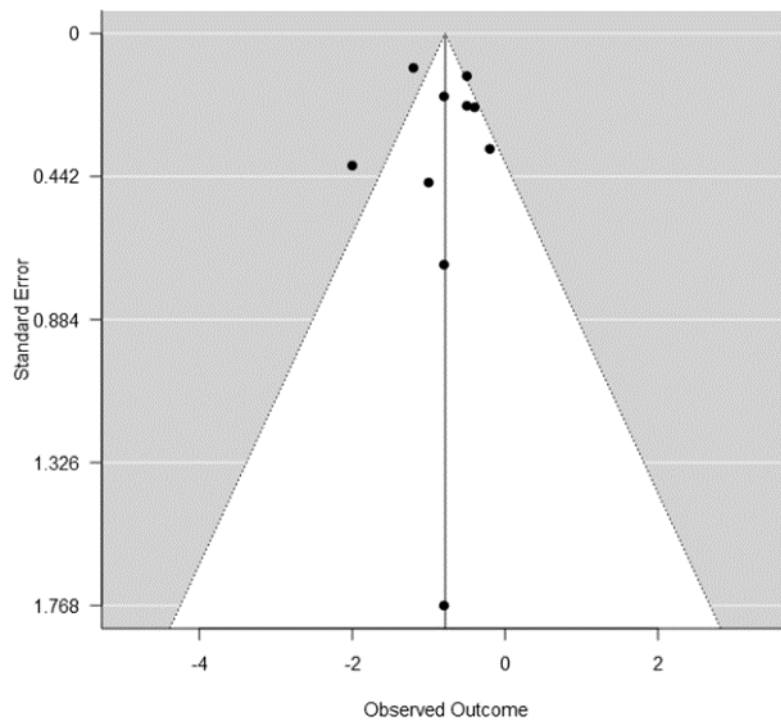

Supplementary Figure 11: Funnel plot for the analysis of CCS class; The trim-fill analysis did not add any further study.

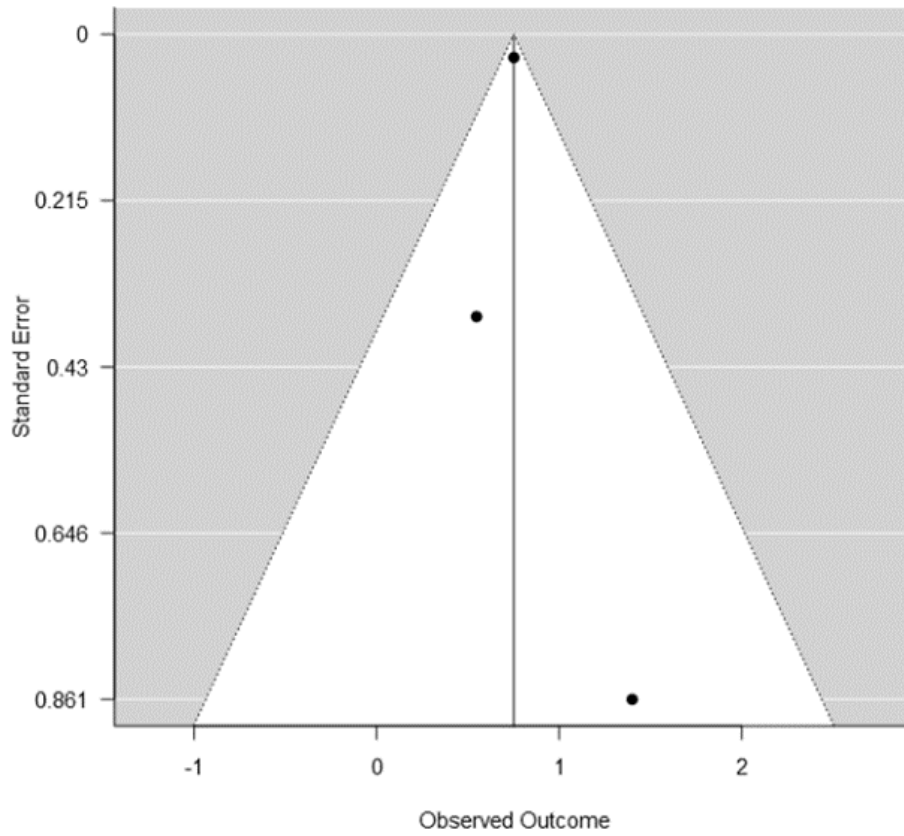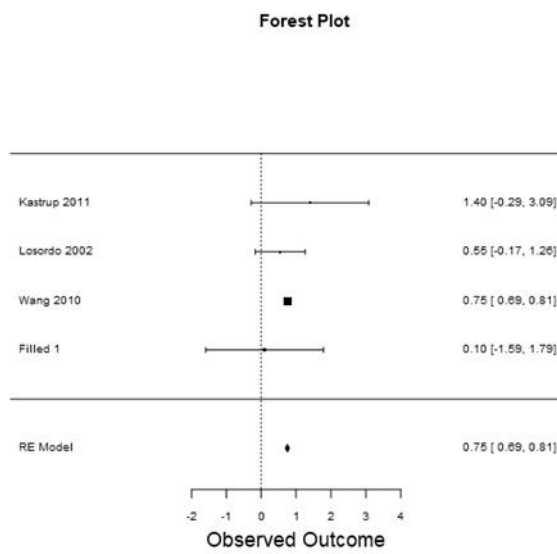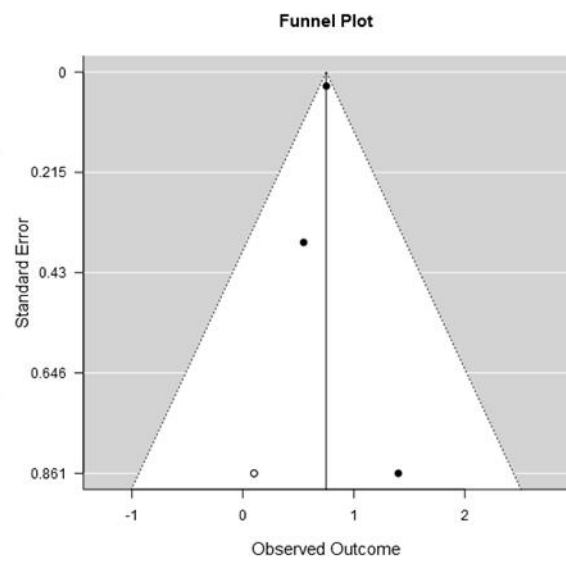

Supplementary Figure: Funnel plot for the analysis of relative change in NTG use (upper panel); Trim-fill analyses with the addition of 1 estimate and the resulting forest plot (lower panel).

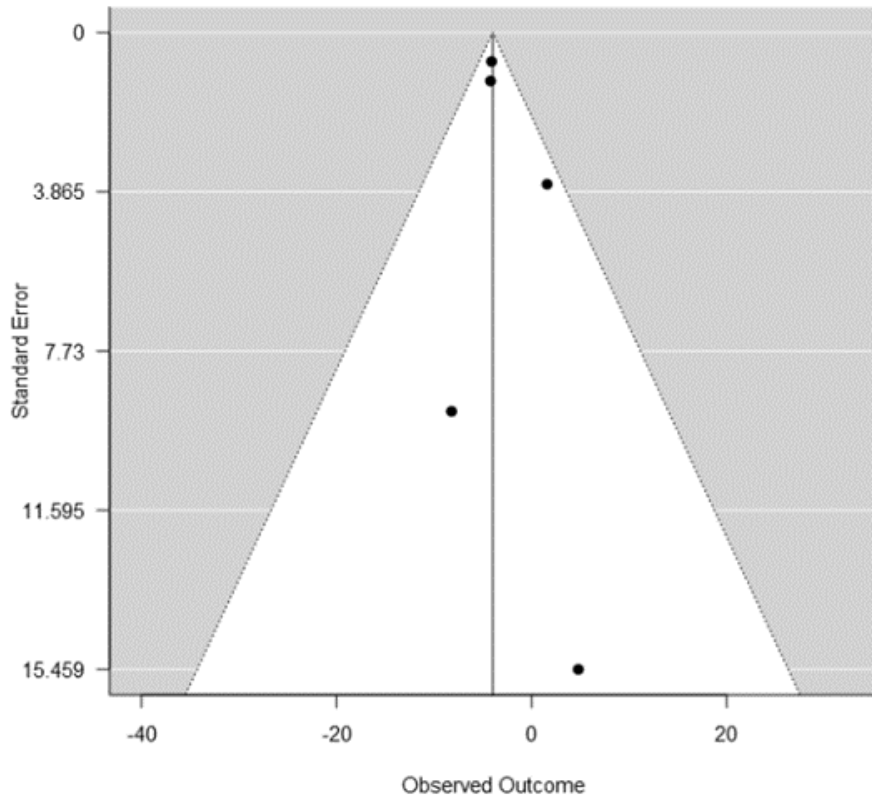

Forest Plot

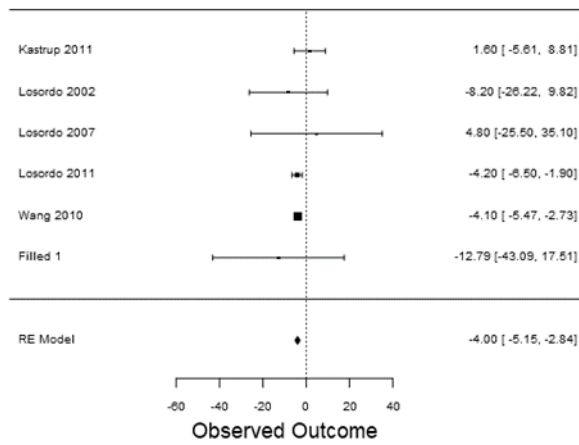

Funnel Plot

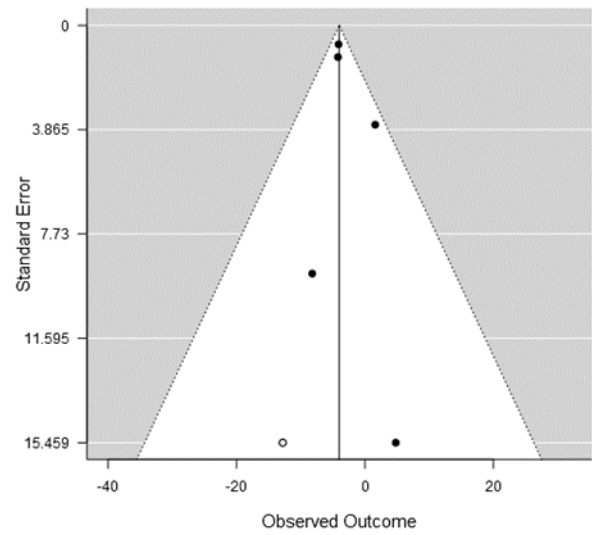

Supplementary Figure: Funnel plot for the analysis of mean difference of NTG use (upper panel); Trim-fill analyses with the addition of 1 estimate and the resulting forest plot (lower panel).

The sham effect of invasive interventions in chronic coronary syndromes

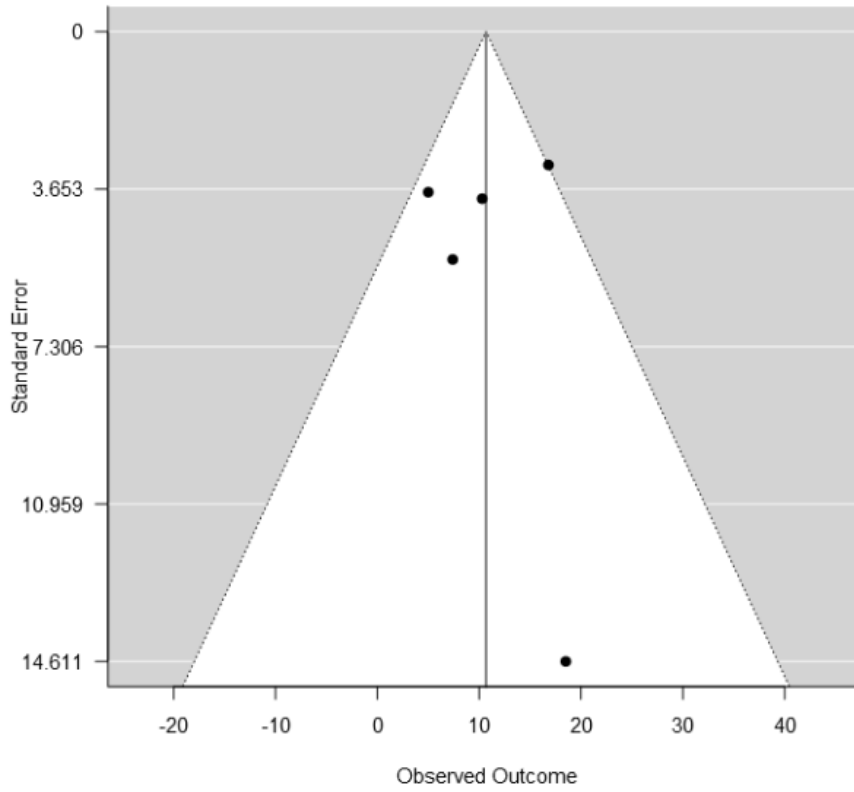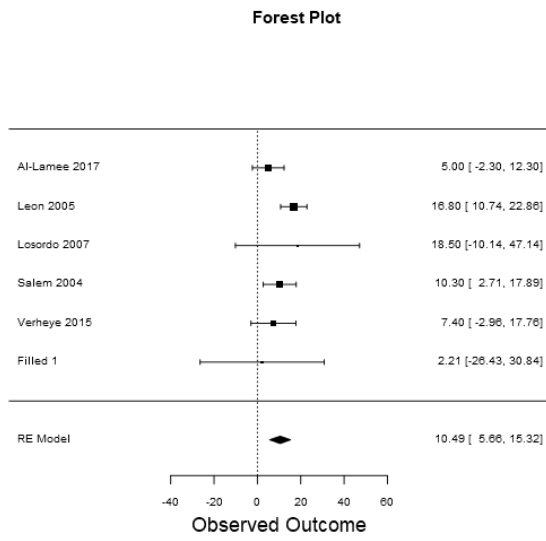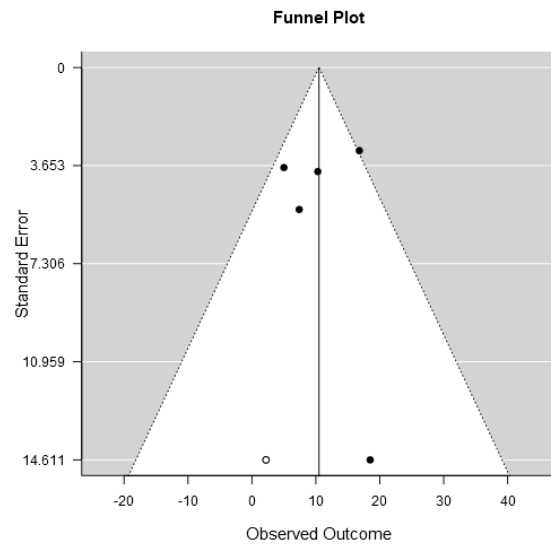

Supplementary Figure: Funnel plot for the analysis of SAQ physical functioning (upper panel); Trim-fill analyses with the addition of 1 estimate and the resulting forest plot (lower panel).

The sham effect of invasive interventions in chronic coronary syndromes

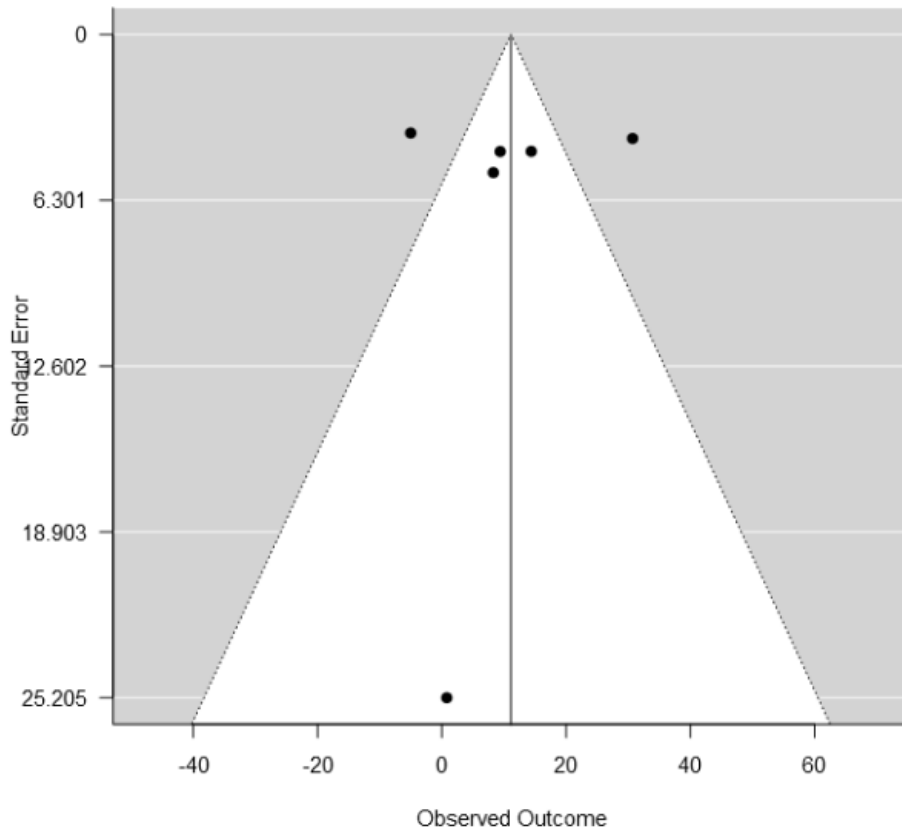

Forest Plot

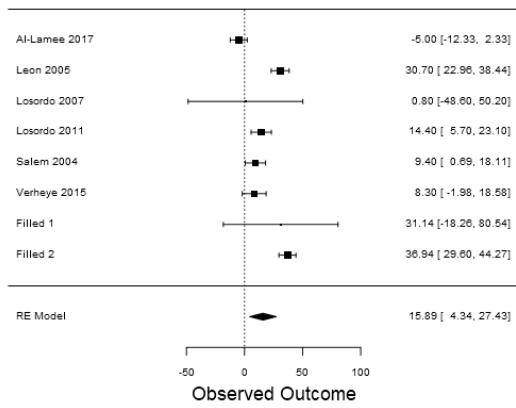

Funnel Plot

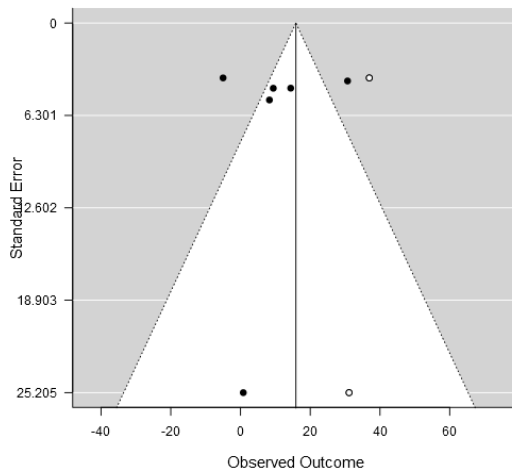

Supplementary Figure: Funnel plot for the analysis of SAQ angular stability (upper panel); Trim-fill analyses with the addition of 1 estimate and the resulting forest plot (lower panel).

The sham effect of invasive interventions in chronic coronary syndromes

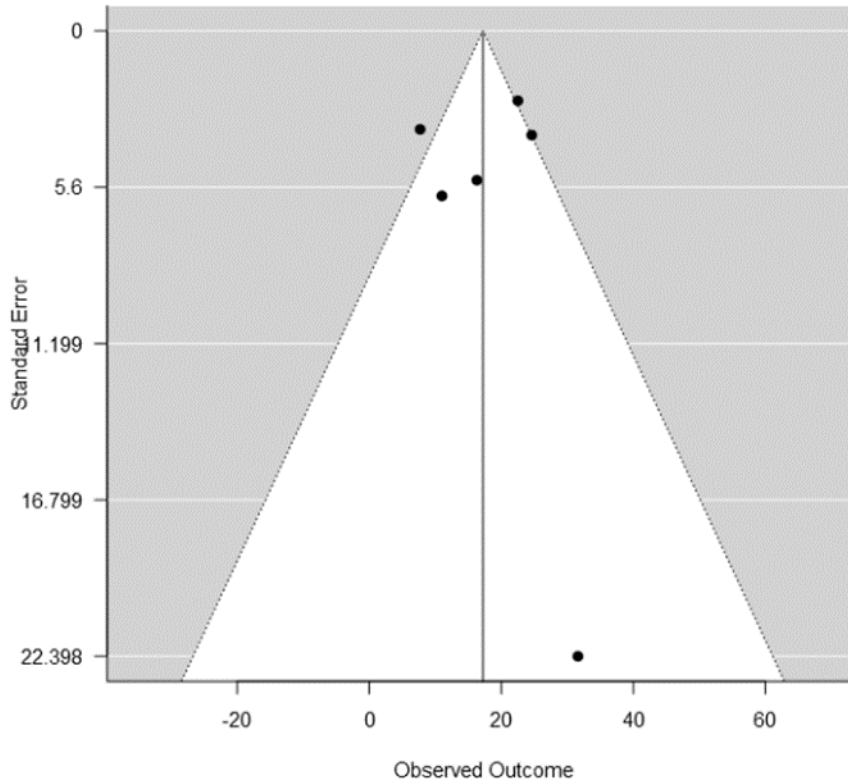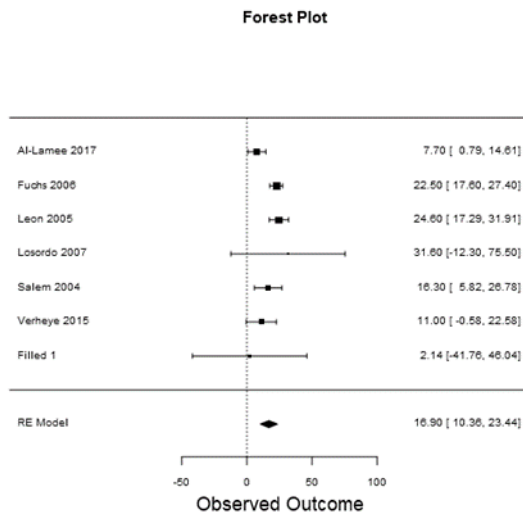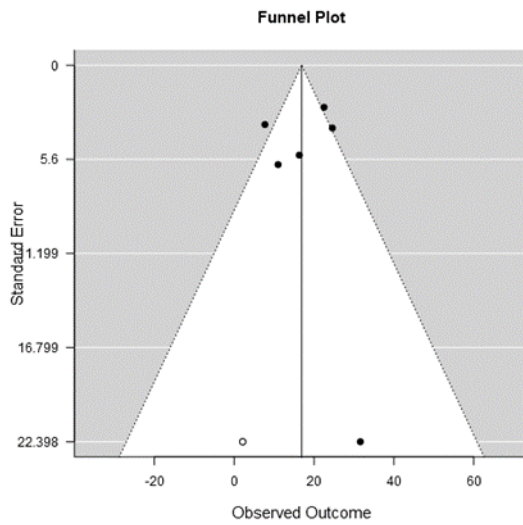

Supplementary Figure: Funnel plot for the analysis of SAQ anginal frequency (upper panel); Trim-fill analyses with the addition of 1 estimate and the resulting forest plot (lower panel).

The sham effect of invasive interventions in chronic coronary syndromes

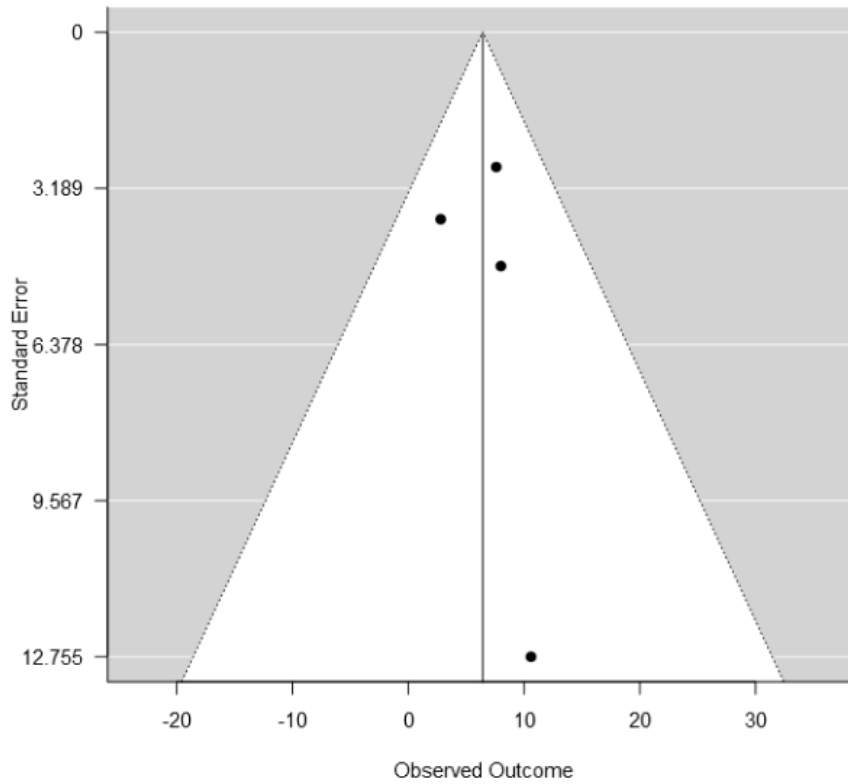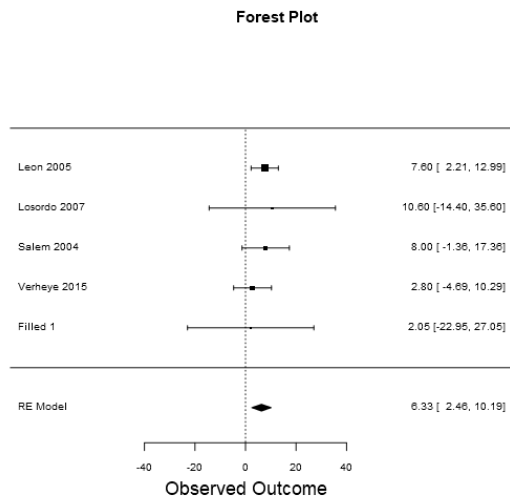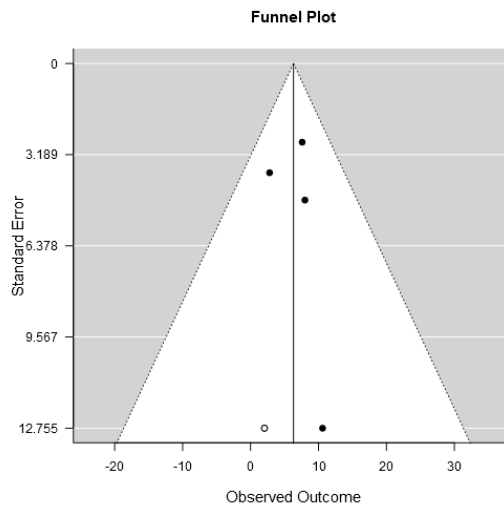

Supplementary Figure: Funnel plot for the analysis of SAQ treatment satisfaction (upper panel); Trim-fill analyses with the addition of 1 estimate and the resulting forest plot (lower panel).



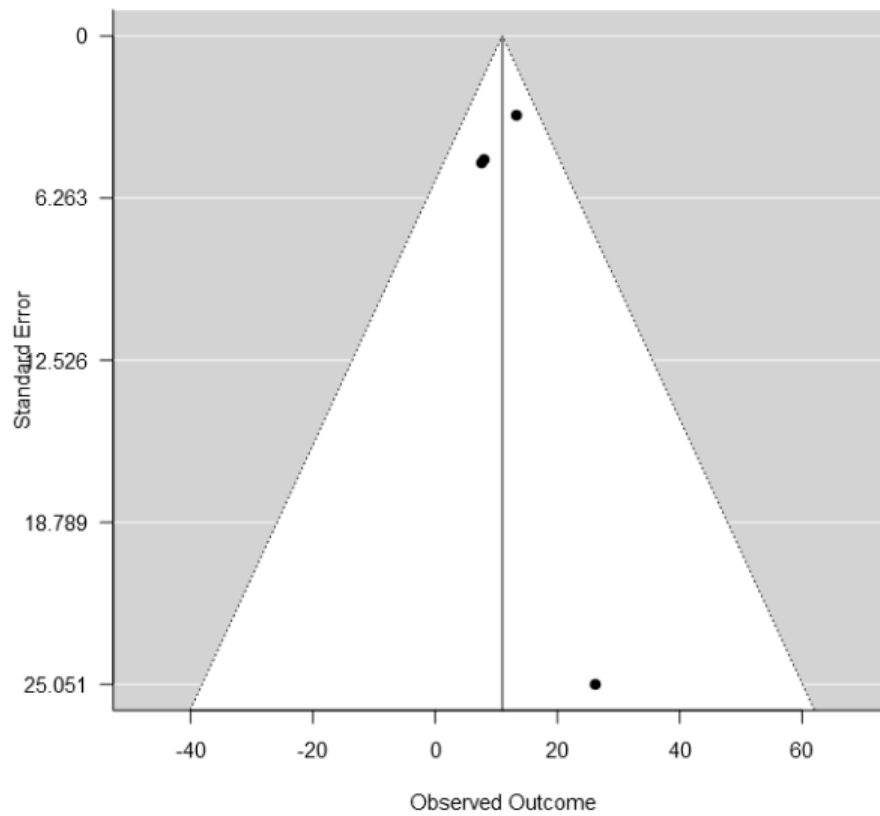

Supplementary Figure: Funnel plot for the analysis of SAQ disease perception (upper panel); The trim-fill analysis did not add any further study.
