# Supplementary material for: The sham effect of invasive interventions in chronic coronary syndromes: a systematic review and meta-analysis
Source: Springer Nature journal article supplement (doi:10.1186/s12872-022-02658-x), 2022-05-14
Supplement: MOESM4 [file 20402460]

# ADDITIONAL FILE 4

## SENSITIVITY ANALYSES AND META-REGRESSIONS

*The sham effect of invasive interventions in chronic coronary syndromes – a systematic review and meta-analysis*

Authors: Catarina Palma, Cláudio David MD, Ricardo M Fernandes MD PhD, Fausto J Pinto MD PhD, João Costa MD PhD, Joaquim J Ferreira MD PhD, Daniel Caldeira MD PhD

## Table of contents

|                                                                                                                                                                                                                                            |   |
|--------------------------------------------------------------------------------------------------------------------------------------------------------------------------------------------------------------------------------------------|---|
| Supplementary Figure: Analysis of CCS class mean change according with the type of sham .....                                                                                                                                              | 3 |
| Supplementary Figure: Analysis of relative change in angina episodes according with the mean LVEF/proportion of HF patients. HF: Heart failure; NR: not reported; NOTE: all these trials had sham intervention+placebo-like solution ..... | 3 |
| Supplementary Figure: Analysis of CCS class mean change according with the mean LVEF/proportion of HF patients. HF: Heart failure; NR: not reported .....                                                                                  | 4 |
| Supplementary Figure: Analysis of absolute NTG use mean change according with the mean LVEF/proportion of HF patients. HF: Heart failure; NR: not reported .....                                                                           | 4 |
| Supplementary Figure: Analysis SAQ angina stability mean change according with the type of sham .....                                                                                                                                      | 5 |
| Supplementary Figure: Analysis of SAQ angina stability mean change according with the mean LVEF/proportion of HF patients. HF: Heart failure; NR: not reported.....                                                                        | 5 |
| Supplementary Figure: Analysis SAQ angina frequency mean change according with the type of sham.....                                                                                                                                       | 6 |
| Supplementary Figure: Analysis of SAQ angina frequency mean change according with the mean LVEF/proportion of HF patients. HF: Heart failure; NR: not reported.....                                                                        | 6 |
| Supplementary Figure: Analyses of CCS class and SAQ angina stability/frequency mean change excluding studies with some concerns in risk of bias.....                                                                                       | 7 |
| Supplementary Figure: Analyses of relative change in angina episodes excluding studies with some concerns in risk of bias.....                                                                                                             | 7 |
| Supplementary Figure: Meta-regression for mean age and relative change in exercise time in the sham arm.....                                                                                                                               | 8 |
| Supplementary Figure: Meta-regression for percentage of diabetes and relative change in exercise time in the sham arm.....                                                                                                                 | 8 |
| Supplementary Figure: Meta-regression for percentage of male patients and relative change in exercise time in the sham arm.....                                                                                                            | 9 |

The sham effect of invasive interventions in chronic coronary syndromes

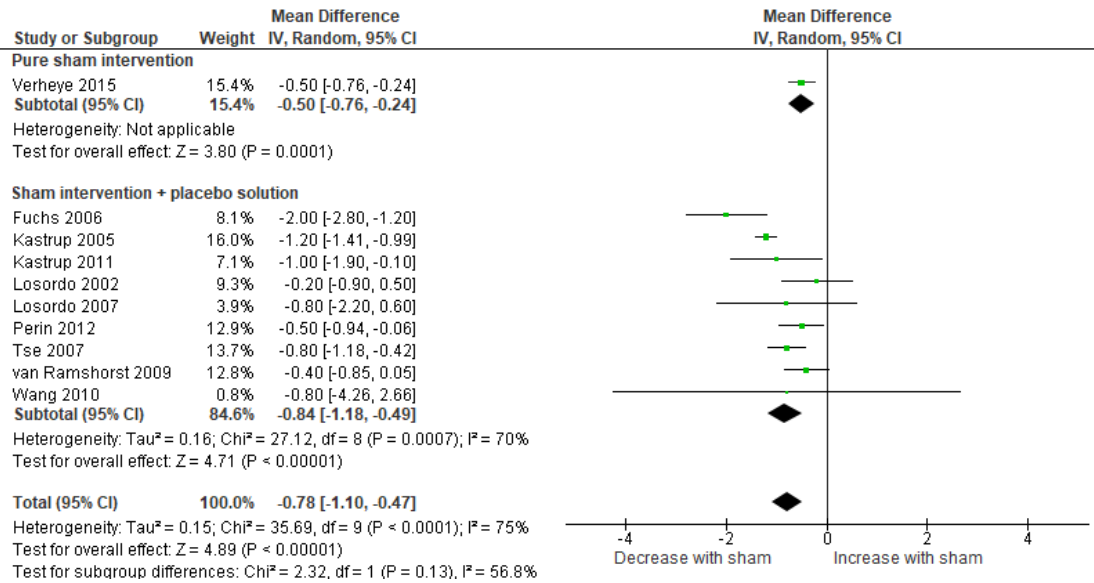

Supplementary Figure: Analysis of CCS class mean change according with the type of sham

Pooled and individual relative effect and 95% CI for exercise time according with the type of sham (pure sham intervention or sham intervention + placebo solution).

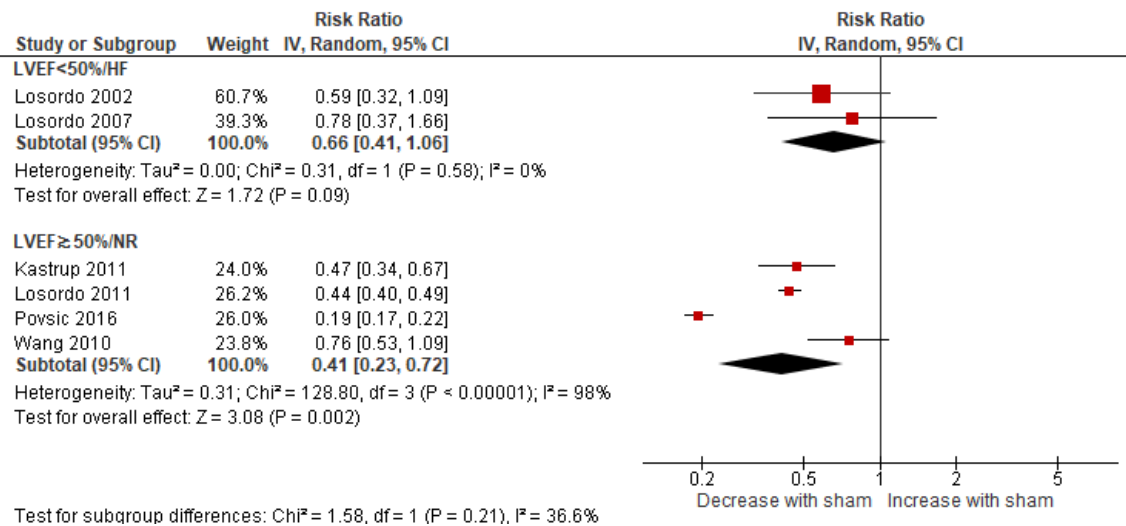

Supplementary Figure: Analysis of relative change in angina episodes according with the mean LVEF/proportion of HF patients. HF: Heart failure; NR: not reported; NOTE: all these trials had sham intervention+placebo-like solution

The sham effect of invasive interventions in chronic coronary syndromes

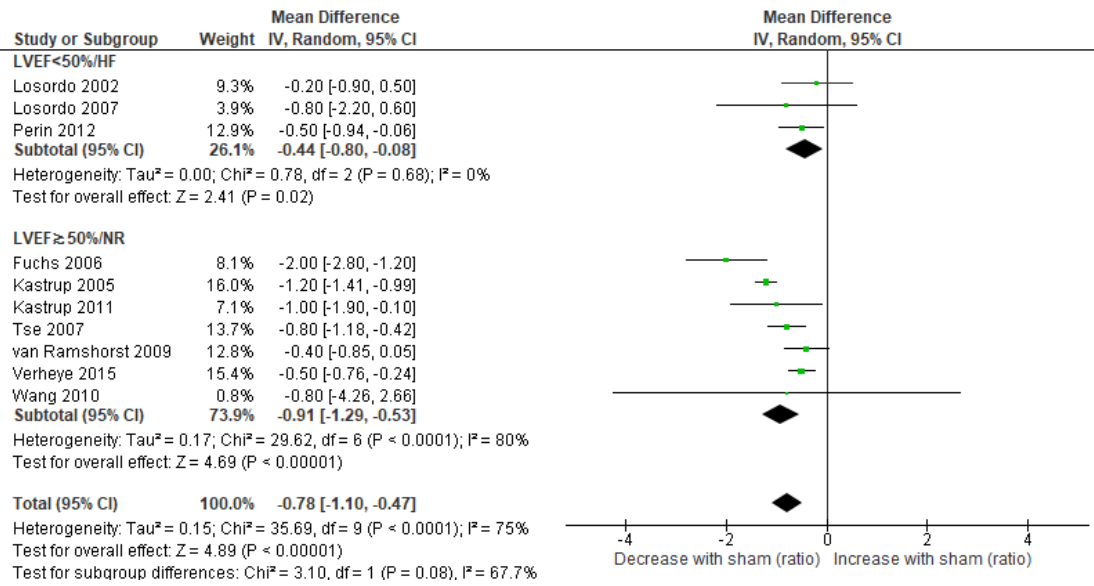

Supplementary Figure: Analysis of CCS class mean change according with the mean LVEF/proportion of HF patients. HF: Heart failure; NR: not reported

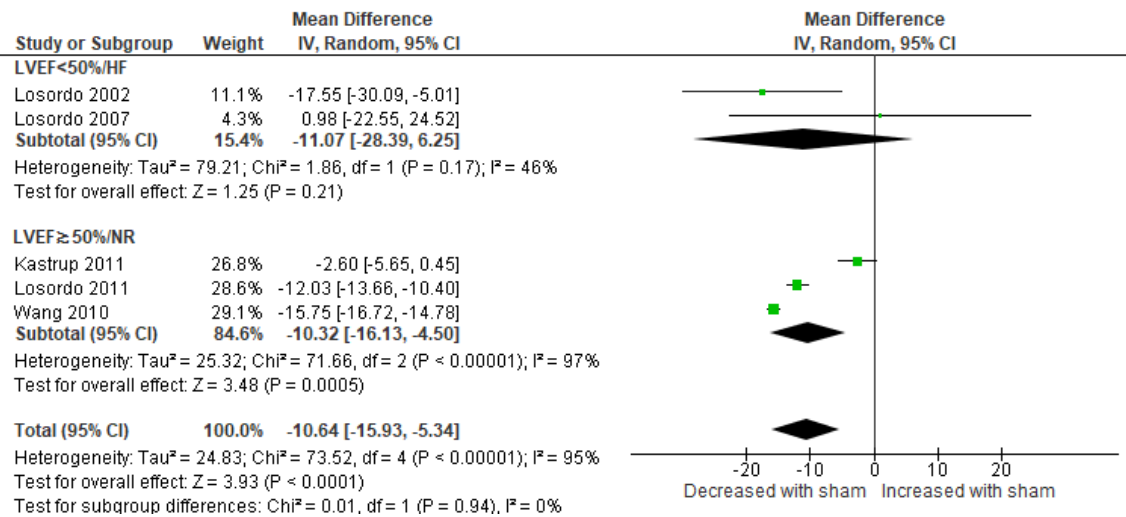

Supplementary Figure: Analysis of absolute NTG use mean change according with the mean LVEF/proportion of HF patients. HF: Heart failure; NR: not reported

The sham effect of invasive interventions in chronic coronary syndromes

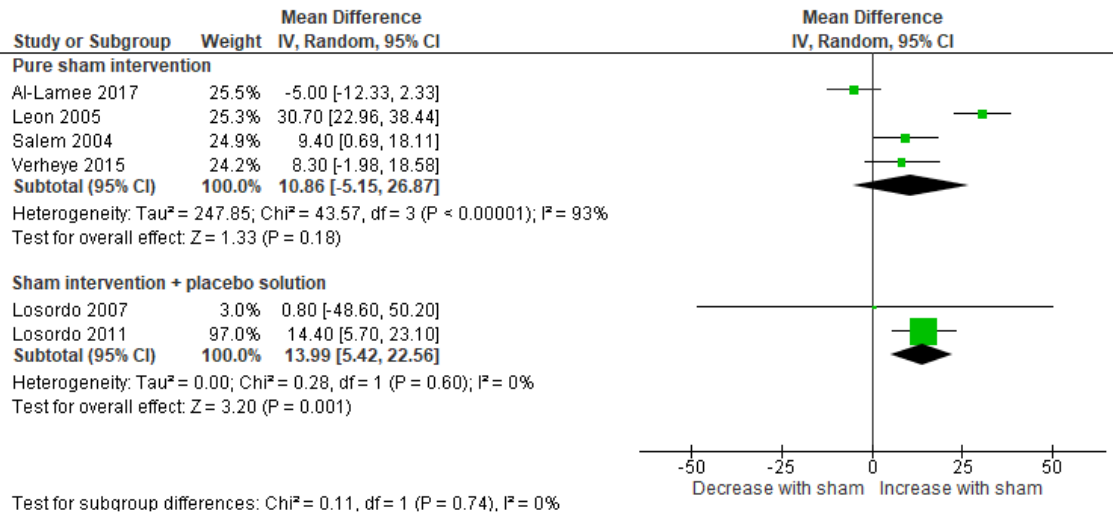

Supplementary Figure: Analysis SAQ angina stability mean change according with the type of sham

Pooled and individual relative effect and 95% CI for exercise time according with the type of sham (pure sham intervention or sham intervention + placebo solution).

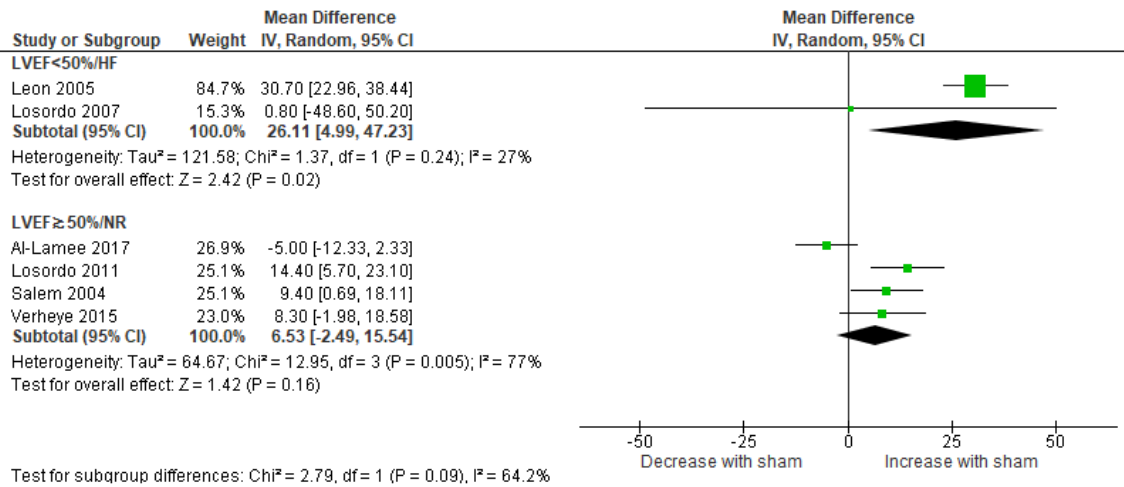

Supplementary Figure: Analysis of SAQ angina stability mean change according with the mean LVEF/proportion of HF patients. HF: Heart failure; NR: not reported

The sham effect of invasive interventions in chronic coronary syndromes

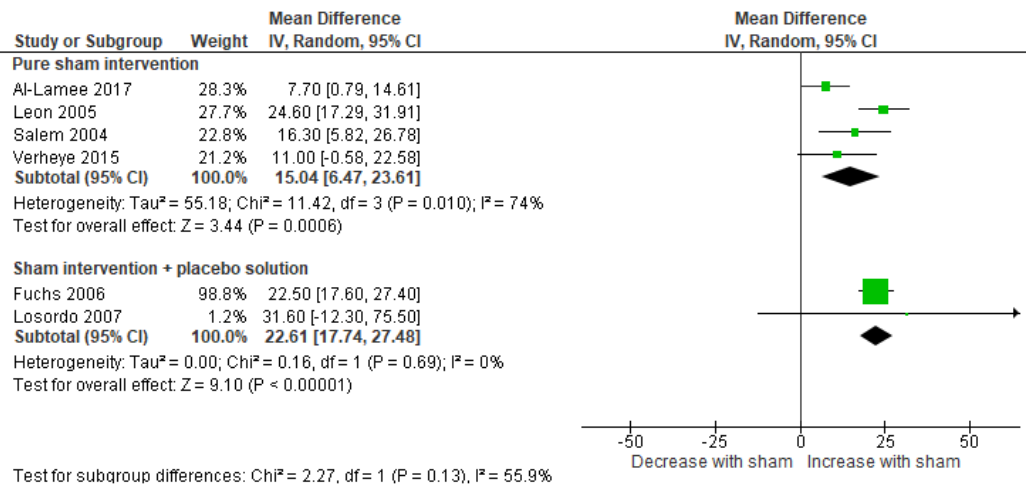

Supplementary Figure: Analysis SAQ angina frequency mean change according with the type of sham

Pooled and individual relative effect and 95% CI for exercise time according with the type of sham (pure sham intervention or sham intervention + placebo solution).

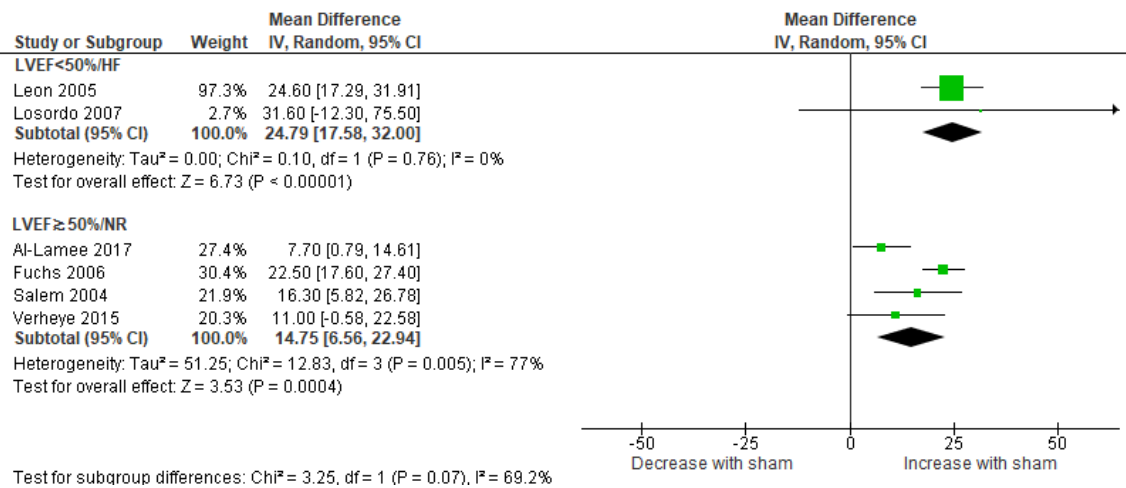

Supplementary Figure: Analysis of SAQ angina frequency mean change according with the mean LVEF/proportion of HF patients. HF: Heart failure; NR: not reported

The sham effect of invasive interventions in chronic coronary syndromes

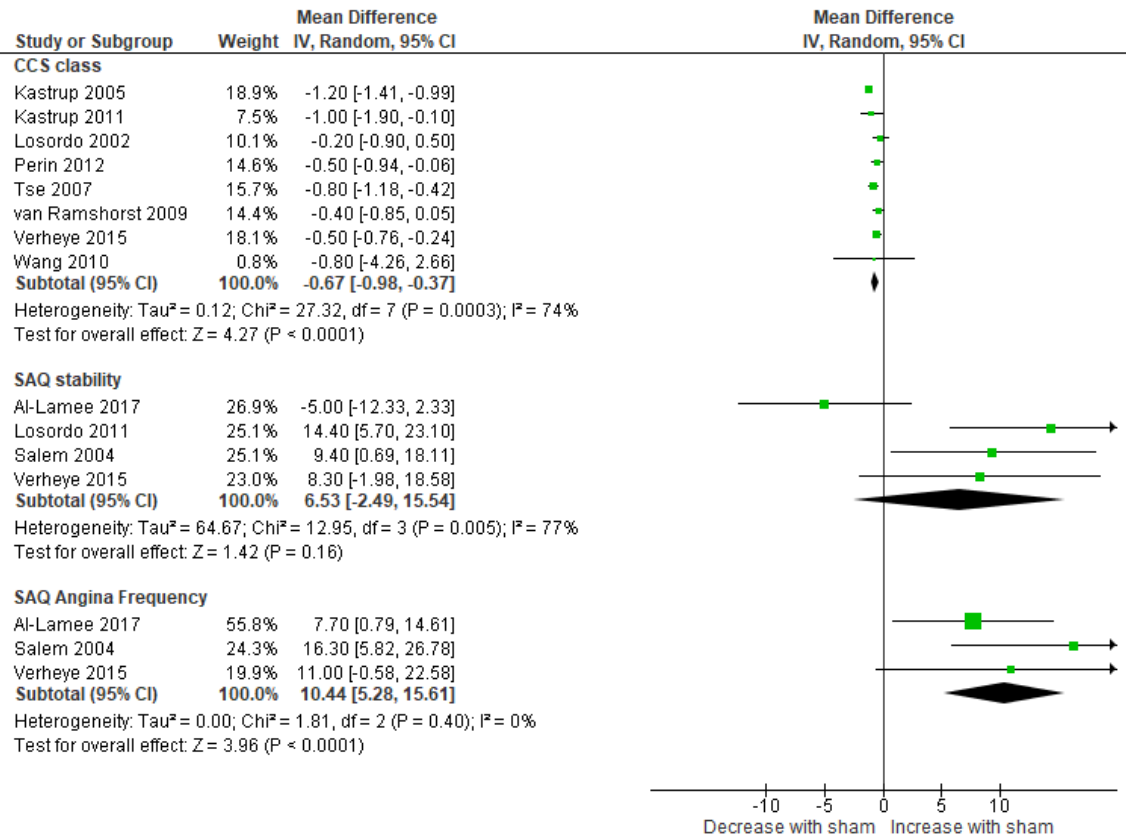

Supplementary Figure: Analyses of CCS class and SAQ angina stability/frequency mean change excluding studies with some concerns in risk of bias.

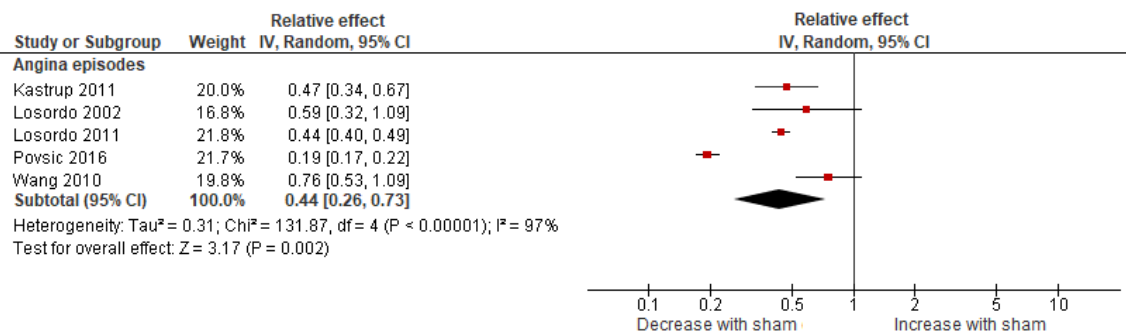

Supplementary Figure: Analyses of relative change in angina episodes excluding studies with some concerns in risk of bias.

The sham effect of invasive interventions in chronic coronary syndromes

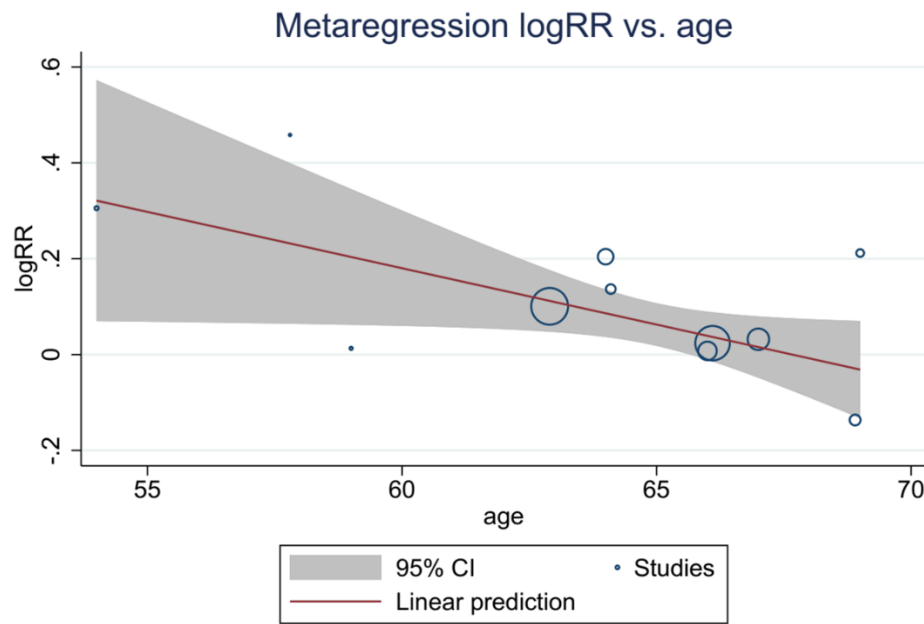

| variable | Coefficient | Std. err. | z     | P> z  | [95% conf. interval] |
|----------|-------------|-----------|-------|-------|----------------------|
| age      | -.0235061   | .0115204  | -2.04 | 0.041 | -.0460857 -.0009266  |

Supplementary Figure: Meta-regression for mean age and relative change in exercise time in the sham arm.

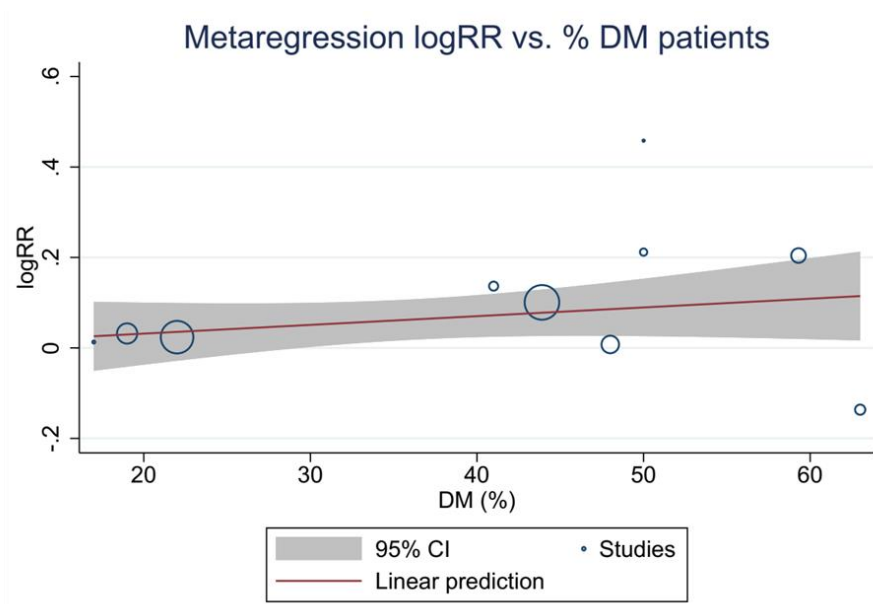

| variable | Coefficient | Std. err. | z    | P> z  | [95% conf. interval] |
|----------|-------------|-----------|------|-------|----------------------|
| DM       | .0019309    | .0016551  | 1.17 | 0.243 | -.001313 .0051748    |

Supplementary Figure: Meta-regression for percentage of diabetes and relative change in exercise time in the sham arm.



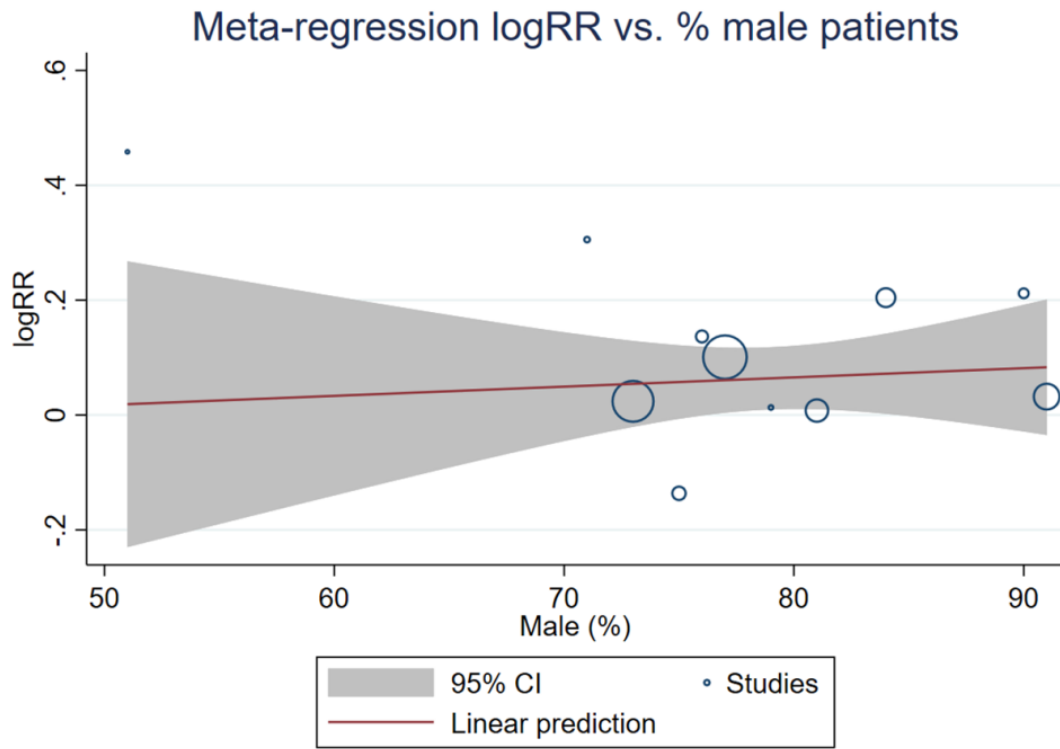

| Variable | Coefficient | Std. err. | z    | P> z  | [95% conf. interval] |          |
|----------|-------------|-----------|------|-------|----------------------|----------|
| Male     | .001608     | .0044341  | 0.36 | 0.717 | -.0070826            | .0102986 |

Supplementary Figure: Meta-regression for percentage of male patients and relative change in exercise time in the sham arm.
